# Supplementary material for: Genome-wide nucleosome and transcription factor responses to genetic perturbations reveal chromatin-mediated mechanisms of transcriptional regulation
Source: HighWire-hosted journal article supplement (doi:10.1101/gr.279637.124), 2025-12-09
Supplement: Supplemental_Table_S1.xlsx [file Supplemental_Table_S1.xlsx]

## Sheet: Sheet1
Supplemental Table S1
List of 201 Saccharomyces cerevisiae mutants used in this study. Column descriptions:
ORF - Open reading frame identifier in SGD
Gene - Canonical gene symbol
SampleID - Sample ID reference for GEO
Strain - Strain of yeast (Saccharomyces cerevisiae) used in this study
DMID - Internal sample ID
Genotype - Genotype of yeast, denoted as mutants
Title, Processed Data, Raw Data, and MD5 Checksum - File identifiers referenced in GEO
ORF	Gene	SampleID	Description	Strain	DMID	Genotype	Title	Processed Data	Raw Data	MD5 Checksum
YAL051W	OAF1	1	Oleate-activated transcription factor	BY4739	DM926	oaf1∆	OAF1_Mutant_MNase	OAF1_quantifications_length_corrected.RDS	DM926_sacCer3_m1_2018-10-18-18-30.bam	f693fa12318da9237da4933c6d960dc7
YAL034C	FUN19	2	Non-essential protein of unknown function	BY4739	DM927	fun19∆	FUN19_Mutant_MNase	FUN19_quantifications_length_corrected.RDS	DM927_sacCer3_m1_2018-10-18-18-57.bam	a24475696185d5b2d969a6a75a0ab8d0
YAL019W	FUN30	3	Snf2p family member with ATP-dependent chromatin remodeling activity	BY4739	DM928	fun30∆	FUN30_Mutant_MNase	FUN30_quantifications_length_corrected.RDS	DM928_sacCer3_m1_2019-02-27-10-41.bam	817b421d1ab85cc4cf8e4f96907c568d
YLR013W	GAT3	4	Protein containing GATA family zinc finger motifs	BY4742	DM929	gat3∆	GAT3_Mutant_MNase	GAT3_quantifications_length_corrected.RDS	DM929_sacCer3_m1_2018-10-18-19-21.bam	80116999321818cd42b09d08743e5623
YLR014C	PPR1	5	Zinc finger transcription factor	BY4742	DM1355	ppr1∆	PPR1_Mutant_MNase	PPR1_quantifications_length_corrected.RDS	DM1355_sacCer3_m1_2019-11-29-15-50.bam	88925182709810c2238df7b030cdf19d
YLR055C	SPT8	6	Subunit of the SAGA transcriptional regulatory complex	BY4742	DM1356	spt8∆	SPT8_Mutant_MNase	SPT8_quantifications_length_corrected.RDS	DM1356_sacCer3_m1_2019-11-29-16-12.bam	eb2cb9a7df2274e3aa305ca65737d587
YLR085C	ARP6	7	Actin-related protein that binds nucleosomes	BY4742	DM1357	arp6∆	ARP6_Mutant_MNase	ARP6_quantifications_length_corrected.RDS	DM1357_sacCer3_m1_2019-11-29-16-33.bam	c2c7bc91cc6f9becc55628b5da9eb734
YLR095C	IOC2	8	Subunit of the Isw1b complex	BY4742	DM1358	ioc2∆	IOC2_Mutant_MNase	IOC2_quantifications_length_corrected.RDS	DM1358_sacCer3_m1_2019-11-29-14-46.bam	497ba0c6c551d3032c907e15916dde4d
YLR098C	CHA4	9	DNA binding transcriptional activator	BY4742	DM930	cha4∆	CHA4_Mutant_MNase	CHA4_quantifications_length_corrected.RDS	DM930_sacCer3_m1_2018-10-18-19-51.bam	e65191bea3ec7c374d3e9a27fac00ae0
YLR113W	HOG1	10	Mitogen-activated protein kinase involved in osmoregulation	BY4742	DM931	hog1∆	HOG1_Mutant_MNase	HOG1_quantifications_length_corrected.RDS	DM931_sacCer3_m1_2018-10-18-20-20.bam	26a35dd824165ff701e8641602ab2f5f
YML081W	TDA9	11	Transcription factor that regulates acetate production	BY4739	DM1242	tda9∆	TDA9_Mutant_MNase	TDA9_quantifications_length_corrected.RDS	DM1242_sacCer3_m1_2019-09-16-20-06.bam	d00c6f6f2fb4921e6339972d701163d8
YML051W	GAL80	12	Transcriptional regulator involved in the repression of GAL genes	BY4742	DM1056	gal80∆	GAL80_Mutant_MNase	GAL80_quantifications_length_corrected.RDS	DM1056_sacCer3_m1_2019-03-04-14-54.bam	2d7f4ecaa4b8da1b4934a9e8521363ca
YMR019W	STB4	15	Putative transcription factor	BY4742	DM964	stb4∆	STB4_Mutant_MNase	STB4_quantifications_length_corrected.RDS	DM964_sacCer3_m1_2018-11-17-12-38.bam	efb502eb84b18c8da18ec6e8a7ebf342
YMR039C	SUB1	16	Transcriptional regulator	BY4742	DM965	sub1∆	SUB1_Mutant_MNase	SUB1_quantifications_length_corrected.RDS	DM965_sacCer3_m1_2018-11-17-13-01.bam	9152085d227cca8b053570ee32e92da7
YMR042W	ARG80	17	Transcription factor involved in regulating arginine-responsive genes	BY4742	DM966	arg80∆	ARG80_Mutant_MNase	ARG80_quantifications_length_corrected.RDS	DM966_sacCer3_m1_2018-11-17-13-25.bam	18b8eeadc3055434b09c51a98d6167a8
YMR164C	MSS11	18	Transcription factor	BY4742	DM1123	mss11∆	MSS11_Mutant_MNase	MSS11_quantifications_length_corrected.RDS	DM1123_sacCer3_m1_2019-05-24-16-32.bam	f0e5606e23824609ca232735c92ddfb6
YMR176W	ECM5	19	Subunit of the Snt2C complex	BY4742	DM1124	ecm5∆	ECM5_Mutant_MNase	ECM5_quantifications_length_corrected.RDS	DM1124_sacCer3_m1_2019-05-24-19-19.bam	a3cf417124c7a23d2060281d10e975c4
YMR182C	RGM1	20	Putative zinc finger DNA binding transcription factor	BY4742	DM1125	rgm1∆	RGM1_Mutant_MNase	RGM1_quantifications_length_corrected.RDS	DM1125_sacCer3_m1_2019-05-24-18-45.bam	739191c93351bb2c67d2111b303fe34c
YMR280C	CAT8	21	Zinc cluster transcriptional activator	BY4742	DM1126	cat8∆	CAT8_Mutant_MNase	CAT8_quantifications_length_corrected.RDS	DM1126_sacCer3_m1_2019-07-21-23-55.bam	3e5260de7eda9ea2e3b0c0275422e651
YNL314W	DAL82	22	Positive regulator of allophanate inducible genes	BY4742	DM1171	dal82∆	DAL82_Mutant_MNase	DAL82_quantifications_length_corrected.RDS	DM1171_sacCer3_m1_2019-07-22-01-16.bam	49cf32808b66d8ea37c863c937027f08
YNL257C	SIP3	23	Putative sterol transfer protein	BY4742	DM1172	sip3∆	SIP3_Mutant_MNase	SIP3_quantifications_length_corrected.RDS	DM1172_sacCer3_m1_2019-07-22-01-47.bam	1ccfde3394e709de50bb4458d099dda3
YOR032C	HMS1	25	bHLH protein with similarity to myc-family transcription factors	BY4742	DM1173	hms1∆	HMS1_Mutant_MNase	HMS1_quantifications_length_corrected.RDS	DM1173_sacCer3_m1_2019-07-22-02-15.bam	278b06aac692217a23fe71dcc8c713f7
YOR038C	HIR2	26	Subunit of HIR nucleosome assembly complex	BY4742	DM1174	hir2∆	HIR2_Mutant_MNase	HIR2_quantifications_length_corrected.RDS	DM1174_sacCer3_m1_2019-07-21-19-14.bam	ba43f3e7181f14ec32019aafabd6c4fd
YOR337W	TEA1	29	Ty1 enhancer activator involved in Ty enhancer-mediated transcription	BY4742	DM1127	tea1∆	TEA1_Mutant_MNase	TEA1_quantifications_length_corrected.RDS	DM1127_sacCer3_m1_2019-07-21-17-33.bam	cffbbc519284c65b2a54a1896c03df0f
YOR344C	TYE7	30	Serine-rich protein that contains a bHLH DNA binding motif	BY4742	DM1175	tye7∆	TYE7_Mutant_MNase	TYE7_quantifications_length_corrected.RDS	DM1175_sacCer3_m1_2019-07-21-19-42.bam	8cd0aa439bf9fb3a125955c7072f9104
YOR358W	HAP5	31	Subunit of the Hap2p/3p/4p/5p CCAAT-binding complex	BY4742	DM1176	hap5∆	HAP5_Mutant_MNase	HAP5_quantifications_length_corrected.RDS	DM1176_sacCer3_m1_2019-07-21-20-19.bam	682a280b8452c94e7498ce91bd459ddc
YOR363C	PIP2	32	Autoregulatory, oleate-activated transcription factor	BY4742	DM1177	pip2∆	PIP2_Mutant_MNase	PIP2_quantifications_length_corrected.RDS	DM1177_sacCer3_m1_2019-07-21-20-56.bam	3a04c184cab05e45303dd12384c4786f
YOR380W	RDR1	33	Transcriptional repressor involved in regulating multidrug resistance	BY4742	DM1182	rdr1∆	RDR1_Mutant_MNase	RDR1_quantifications_length_corrected.RDS	DM1182_sacCer3_m1_2019-08-05-18-35.bam	9bf541b7980852d3d870c0b85a603957
YPL248C	GAL4	37	DNA-binding transcription factor required for activating GAL genes	BY4742	DM1180	gal4∆	GAL4_Mutant_MNase	GAL4_quantifications_length_corrected.RDS	DM1180_sacCer3_m1_2019-07-21-18-44.bam	bbf6c8becfb581ec428158b5dc770f45
YPL177C	CUP9	39	Homeodomain-containing transcriptional repressor	BY4742	DM1183	cup9∆	CUP9_Mutant_MNase	CUP9_quantifications_length_corrected.RDS	DM1183_sacCer3_m1_2019-08-05-18-07.bam	f83c5c94c50add5c51e3dc0841787a96
YPL138C	SPP1	40	Subunit of COMPASS (Set1C)	BY4742	DM1184	spp1∆	SPP1_Mutant_MNase	SPP1_quantifications_length_corrected.RDS	DM1184_sacCer3_m1_2019-08-05-19-29.bam	abeaac5d9774bb5699db30053e5546c1
YPL133C	RDS2	41	Transcription factor involved in regulating gluconeogenesis	BY4742	DM1185	rds2∆	RDS2_Mutant_MNase	RDS2_quantifications_length_corrected.RDS	DM1185_sacCer3_m1_2019-08-05-19-02.bam	23b1dcf9ce994a20e9ac39fb83e04565
YPL129W	TAF14	42	Subunit of TFIID, TFIIF, INO80, SWI/SNF, and NuA3 complexes	BY4742	DM1186	taf14∆	TAF14_Mutant_MNase	TAF14_quantifications_length_corrected.RDS	DM1186_sacCer3_m1_2019-08-05-20-22.bam	30c51d05bd2d2c8e348d8cdd78b0640b
YPL127C	HHO1	43	Histone H1, linker histone with roles in meiosis and sporulation	BY4742	DM1187	hho1∆	HHO1_Mutant_MNase	HHO1_quantifications_length_corrected.RDS	DM1187_sacCer3_m1_2019-08-05-19-52.bam	12b64869a905bf0e3cfc4e4c7eed6f57
YBR182C	SMP1	44	MADS-box transcription factor involved in osmotic stress response	BY4742	DM1188	smp1∆	SMP1_Mutant_MNase	SMP1_quantifications_length_corrected.RDS	DM1188_sacCer3_m1_2019-08-05-21-31.bam	95b8c0a198c6a61419cdd6132b8643d5
YBR215W	HPC2	45	Subunit of the HIR complex	BY4742	DM1189	hpc2∆	HPC2_Mutant_MNase	HPC2_quantifications_length_corrected.RDS	DM1189_sacCer3_m1_2019-08-05-20-53.bam	8c57e0480f63259ec8ca2cfed2099563
YBR239C	ERT1	46	Transcriptional regulator	BY4742	DM1190	ert1∆	ERT1_Mutant_MNase	ERT1_quantifications_length_corrected.RDS	DM1190_sacCer3_m1_2019-08-05-14-55.bam	5ddeb8967708bd6de2fcbbf8e28054e4
YDR392W	SPT3	52	Subunit of the SAGA and SAGA-like transcriptional regulatory complexes	BY4742	DM970	spt3∆	SPT3_Mutant_MNase	SPT3_quantifications_length_corrected.RDS	DM970_sacCer3_m1_2018-11-17-15-15.bam	23a95b20405f1a96c29bcdd68bbeae2b
YDR421W	ARO80	53	Zinc finger transcriptional activator of the Zn2Cys6 family	BY4742	DM1118	aro80∆	ARO80_Mutant_MNase	ARO80_quantifications_length_corrected.RDS	DM1118_sacCer3_m1_2019-05-24-19-50.bam	8b6ef8660098252ed1f8e21663d5e0c8
YDR423C	CAD1	54	AP-1-like basic leucine zipper (bZIP) transcriptional activator	BY4742	DM1119	cad1∆	CAD1_Mutant_MNase	CAD1_quantifications_length_corrected.RDS	DM1119_sacCer3_m1_2019-05-24-20-24.bam	0b1fbe3ba6d8ed30ae09cc5edf312fe9
YEL009C	GCN4	55	bZIP transcriptional activator of amino acid biosynthetic genes	BY4742	DM1191	gcn4∆	GCN4_Mutant_MNase	GCN4_quantifications_length_corrected.RDS	DM1191_sacCer3_m1_2019-08-05-15-26.bam	37b90873b207a942d61ea898c80ad6a4
YER028C	MIG3	56	Transcriptional regulator	BY4742	DM1192	mig3∆	MIG3_Mutant_MNase	MIG3_quantifications_length_corrected.RDS	DM1192_sacCer3_m1_2019-08-05-13-48.bam	e046546ff3302630576ac61e6290a945
YER040W	GLN3	57	Transcriptional activator of genes regulated by nitrogen catabolite r	BY4742	DM1193	gln3∆	GLN3_Mutant_MNase	GLN3_quantifications_length_corrected.RDS	DM1193_sacCer3_m1_2019-08-05-14-18.bam	324ea53c5c765f67a18d48485ea70e93
YER045C	ACA1	58	ATF/CREB family basic leucine zipper (bZIP) transcription factor	BY4742	DM1194	aca1∆	ACA1_Mutant_MNase	ACA1_quantifications_length_corrected.RDS	DM1194_sacCer3_m1_2019-08-05-16-57.bam	e081800f0b288355f369bd025d263d1c
YHR178W	STB5	65	Transcription factor	BY4742	DM1122	stb5∆	STB5_Mutant_MNase	STB5_quantifications_length_corrected.RDS	DM1122_sacCer3_m1_2019-05-24-17-04.bam	cdf6ccecb41fbe5ddae26e235cf02aed
YHR206W	SKN7	66	Nuclear response regulator and transcription factor	BY4742	DM1115	skn7∆	SKN7_Mutant_MNase	SKN7_quantifications_length_corrected.RDS	DM1115_sacCer3_m1_2019-05-23-23-30.bam	f1f89ce88e9b9fec5d43a60197bd4dda
YCL055W	KAR4	67	Transcription factor required for response to pheromones	BY4742	DM1116	kar4∆	KAR4_Mutant_MNase	KAR4_quantifications_length_corrected.RDS	DM1116_sacCer3_m1_2019-05-23-21-42.bam	ac1391c8852f1fafb8807dc8f5a015f9
YLR451W	LEU3	68	Zinc-knuckle transcription factor, repressor and activator	BY4742	DM1090	leu3∆	LEU3_Mutant_MNase	LEU3_quantifications_length_corrected.RDS	DM1090_sacCer3_m1_2019-05-03-15-50.bam	a5390a3b21e808d6acf6c134c446cf9f
YLR131C	ACE2	69	Transcription factor required for septum destruction after cytokinesis	BY4742	DM1091	ace2∆	ACE2_Mutant_MNase	ACE2_quantifications_length_corrected.RDS	DM1091_sacCer3_m1_2019-05-03-16-10.bam	b6585adebe215b647b8fe7b12272c286
YLR176C	RFX1	70	Major transcriptional repressor of DNA-damage-regulated genes	BY4742	DM1092	rfx1∆	RFX1_Mutant_MNase	RFX1_quantifications_length_corrected.RDS	DM1092_sacCer3_m1_2019-05-03-16-28.bam	406f6b8fdc98f4c1f2a9eec7ee9aeb0e
YLR182W	SWI6	71	Transcription cofactor	BY4742	DM1036	swi6∆	SWI6_Mutant_MNase	SWI6_quantifications_length_corrected.RDS	DM1036_sacCer3_m1_2019-03-04-17-43.bam	eec7403c6dd2ccf68c556d871297f857
YLR183C	TOS4	72	Putative transcription factor, contains Forkhead Associated domain	BY4742	DM1037	tos4∆	TOS4_Mutant_MNase	TOS4_quantifications_length_corrected.RDS	DM1037_sacCer3_m1_2019-03-04-18-26.bam	1fbea260fd6300dcadb1933e75d00c0f
YKL015W	PUT3	73	Transcriptional activator	BY4742	DM1199	put3∆	PUT3_Mutant_MNase	PUT3_quantifications_length_corrected.RDS	DM1199_sacCer3_m1_2019-08-05-13-15.bam	dd3a37d277b06e17f6fa38a06e2ecb2b
YKL038W	RGT1	74	Glucose-responsive transcription factor	BY4742	DM1038	rgt1∆	RGT1_Mutant_MNase	RGT1_quantifications_length_corrected.RDS	DM1038_sacCer3_m1_2019-03-04-18-48.bam	a0b52d29eb45b0d5c6cf3846d5aff2d5
YKL043W	PHD1	75	Transcriptional activator that enhances pseudohyphal growth	BY4742	DM1039	phd1∆	PHD1_Mutant_MNase	PHD1_quantifications_length_corrected.RDS	DM1039_sacCer3_m1_2019-03-04-19-17.bam	1667e80ab6a97df0b6ae4ea9a5ec9a85
YKL062W	MSN4	76	Stress-responsive transcriptional activator	BY4742	DM1066	msn4∆	MSN4_Mutant_MNase	MSN4_quantifications_length_corrected.RDS	DM1066_sacCer3_m1_2019-04-06-01-32.bam	69fbd3dad22b36818cd5bca222c7f1d8
YGR056W	RSC1	80	Component of the RSC chromatin remodeling complex	BY4742	DM1042	rsc1∆	RSC1_Mutant_MNase	RSC1_quantifications_length_corrected.RDS	DM1042_sacCer3_m1_2019-03-04-21-54.bam	923be28acd6e1f5c59728daaa5ea52ff
YGR104C	SRB5	81	Subunit of the RNA polymerase II mediator complex	BY4742	DM1043	srb5∆	SRB5_Mutant_MNase	SRB5_quantifications_length_corrected.RDS	DM1043_sacCer3_m1_2019-03-04-22-24.bam	5ecdd88aa4c75d51174ae237e56f2919
YOR113W	AZF1	82	Zinc-finger transcription factor	BY4742	DM1044	azf1∆	AZF1_Mutant_MNase	AZF1_quantifications_length_corrected.RDS	DM1044_sacCer3_m1_2019-03-04-22-50.bam	6ab0a181952c9d0180303b8c64e1d90c
YOR140W	SFL1	83	Transcriptional repressor and activator	BY4742	DM1045	sfl1∆	SFL1_Mutant_MNase	SFL1_quantifications_length_corrected.RDS	DM1045_sacCer3_m1_2019-03-04-23-16.bam	667f13817d512b36eb43dada5328981f
YOR144C	ELG1	84	Subunit of an alternative replication factor C complex	BY4742	DM1093	elg1∆	ELG1_Mutant_MNase	ELG1_quantifications_length_corrected.RDS	DM1093_sacCer3_m1_2019-05-03-16-47.bam	bf4a1aac9bbb481c4a7530bf7811499c
YOR162C	YRR1	85	Zn2-Cys6 zinc-finger transcription factor	BY4742	DM1094	yrr1∆	YRR1_Mutant_MNase	YRR1_quantifications_length_corrected.RDS	DM1094_sacCer3_m1_2019-05-05-13-08.bam	77b5efe5736a90a8793e02b5fa704387
YOR172W	YRM1	86	Zinc finger transcription factor involved in multidrug resistance	BY4742	DM1095	yrm1∆	YRM1_Mutant_MNase	YRM1_quantifications_length_corrected.RDS	DM1095_sacCer3_m1_2019-05-05-13-30.bam	df36f3eccd17485d577db9f5662a6613
YOR229W	WTM2	87	Transcriptional modulator	BY4742	DM1096	wtm2∆	WTM2_Mutant_MNase	WTM2_quantifications_length_corrected.RDS	DM1096_sacCer3_m1_2019-05-05-13-50.bam	f1d7654fb754b239d50d82bd7bce22e7
YOR230W	WTM1	88	Transcriptional modulator	BY4742	DM1097	wtm1∆	WTM1_Mutant_MNase	WTM1_quantifications_length_corrected.RDS	DM1097_sacCer3_m1_2019-05-05-14-09.bam	85b44f6d8ae440e020b4d20d7246a1b0
YLR418C	CDC73	89	Component of the Paf1p complex	BY4742	DM1098	cdc73∆	CDC73_Mutant_MNase	CDC73_quantifications_length_corrected.RDS	DM1098_sacCer3_m1_2019-05-05-14-31.bam	cd4a1b24ca850de59d331a64eaf4513e
YDR169C	STB3	90	Ribosomal RNA processing element (RRPE)-binding protein	BY4742	DM1099	stb3∆	STB3_Mutant_MNase	STB3_quantifications_length_corrected.RDS	DM1099_sacCer3_m1_2019-05-05-14-52.bam	5032624a7a23904090ae689ac61b02b7
YDR192C	NUP42	91	FG-nucleoporin component of central core of the nuclear pore complex	BY4742	DM1100	nup42∆	NUP42_Mutant_MNase	NUP42_quantifications_length_corrected.RDS	DM1100_sacCer3_m1_2019-05-05-15-16.bam	89fa0922b4a5dfd31a8f86d82e5d0453
YDR195W	REF2	92	RNA-binding protein	BY4742	DM1046	ref2∆	REF2_Mutant_MNase	REF2_quantifications_length_corrected.RDS	DM1046_sacCer3_m1_2019-03-04-23-41.bam	909dbff0f7f4e1e3bf445045b7dde5c9
YDR213W	UPC2	93	Sterol regulatory element binding protein	BY4742	DM1101	upc2∆	UPC2_Mutant_MNase	UPC2_quantifications_length_corrected.RDS	DM1101_sacCer3_m1_2019-05-05-13-10.bam	73190ad285b51f13807f6e0ff92c2cbc
YDR216W	ADR1	94	Carbon source-responsive zinc-finger transcription factor	BY4742	DM1102	adr1∆	ADR1_Mutant_MNase	ADR1_quantifications_length_corrected.RDS	DM1102_sacCer3_m1_2019-05-07-15-08.bam	f88e8c588c82695a6714157094aa174e
YDR223W	CRF1	95	Transcriptional corepressor	BY4742	DM1047	crf1∆	CRF1_Mutant_MNase	CRF1_quantifications_length_corrected.RDS	DM1047_sacCer3_m1_2019-03-05-00-07.bam	0d89c4176a796eb031b5b93b7d4a5e5e
YLR263W	RED1	96	Protein component of the synaptonemal complex axial elements	BY4742	DM1048	red1∆	RED1_Mutant_MNase	RED1_quantifications_length_corrected.RDS	DM1048_sacCer3_m1_2019-03-04-20-21.bam	e1745c5bcf2e7ba745212e9aebfa9358
YLR266C	PDR8	97	Transcription factor	BY4742	DM1049	pdr8∆	PDR8_Mutant_MNase	PDR8_quantifications_length_corrected.RDS	DM1049_sacCer3_m1_2019-03-04-20-49.bam	22466b374b9f4dcb8a92429a2e66b9be
YGL209W	MIG2	98	Zinc finger transcriptional repressor	BY4742	DM1050	mig2∆	MIG2_Mutant_MNase	MIG2_quantifications_length_corrected.RDS	DM1050_sacCer3_m1_2019-03-04-21-18.bam	1263180ecde36f8858b1b0b97b5c4f08
YGL237C	HAP2	99	Subunit of the Hap2p/3p/4p/5p CCAAT-binding complex	BY4742	DM1051	hap2∆	HAP2_Mutant_MNase	HAP2_quantifications_length_corrected.RDS	DM1051_sacCer3_m1_2019-03-04-17-06.bam	a7da078685371588c0e6bbc6e1eb6ff4
YGL254W	FZF1	100	Transcription factor involved in sulfite metabolism	BY4742	DM1052	fzf1∆	FZF1_Mutant_MNase	FZF1_quantifications_length_corrected.RDS	DM1052_sacCer3_m1_2019-03-05-00-34.bam	a57bde1e48f88c0bfa719b2c3bc1dc63
YPL089C	RLM1	101	MADS-box transcription factor	BY4742	DM1053	rlm1∆	RLM1_Mutant_MNase	RLM1_quantifications_length_corrected.RDS	DM1053_sacCer3_m1_2019-03-04-16-34.bam	9fc59723990f2662a8ac9160f22dbcba
YPL048W	CAM1	102	One of two isoforms of the gamma subunit of eEF1B	BY4742	DM1054	cam1∆	CAM1_Mutant_MNase	CAM1_quantifications_length_corrected.RDS	DM1054_sacCer3_m1_2019-03-04-16-02.bam	e4cd46e03404c80dbb80efec5a9bf941
YPL038W	MET31	103	Zinc-finger DNA-binding transcription factor	BY4742	DM1244	met31∆	MET31_Mutant_MNase	MET31_quantifications_length_corrected.RDS	DM1244_sacCer3_m1_2019-09-16-19-14.bam	0bb09ef80659676c72d8613f3e87e9c2
YPL031C	PHO85	104	Cyclin-dependent kinase	BY4742	DM1245	pho85∆	PHO85_Mutant_MNase	PHO85_quantifications_length_corrected.RDS	DM1245_sacCer3_m1_2019-09-16-19-41.bam	798f45f3663cd2b1d051d40efac83c15
YPL021W	ECM23	105	Non-essential protein of unconfirmed function	BY4742	DM1246	ecm23∆	ECM23_Mutant_MNase	ECM23_quantifications_length_corrected.RDS	DM1246_sacCer3_m1_2019-09-16-18-22.bam	2028ac38e1c52d4d008ebead9f7b635b
YPR135W	CTF4	106	Chromatin-associated protein	BY4742	DM1247	ctf4∆	CTF4_Mutant_MNase	CTF4_quantifications_length_corrected.RDS	DM1247_sacCer3_m1_2019-09-16-18-47.bam	2b089072027a5d2d3f889775d73bc2fa
YPR199C	ARR1	107	Transcriptional activator of the basic leucine zipper (bZIP) family	BY4742	DM1248	arr1∆	ARR1_Mutant_MNase	ARR1_quantifications_length_corrected.RDS	DM1248_sacCer3_m1_2019-09-16-17-24.bam	a0cd39a02c403f6473b580fd544bc15d
YCR106W	RDS1	108	Putative zinc cluster transcription factor	BY4742	DM1249	rds1∆	RDS1_Mutant_MNase	RDS1_quantifications_length_corrected.RDS	DM1249_sacCer3_m1_2019-09-16-17-49.bam	783ab043606e75f37b5a4f444a09ee78
YFR034C	PHO4	109	Basic helix-loop-helix (bHLH) transcription factor of the myc-family	BY4742	DM1250	pho4∆	PHO4_Mutant_MNase	PHO4_quantifications_length_corrected.RDS	DM1250_sacCer3_m1_2019-09-16-23-14.bam	c6faa15bf6273bdef66ce79029ffead4
YGR249W	MGA1	110	Protein similar to heat shock transcription factor	BY4742	DM1251	mga1∆	MGA1_Mutant_MNase	MGA1_quantifications_length_corrected.RDS	DM1251_sacCer3_m1_2019-09-16-22-42.bam	b2764818aa738260da1630b0075d7469
YBL005W	PDR3	111	Transcriptional activator of the pleiotropic drug resistance network	BY4742	DM1252	pdr3∆	PDR3_Mutant_MNase	PDR3_quantifications_length_corrected.RDS	DM1252_sacCer3_m1_2019-09-17-00-10.bam	9de5f4a9571be7343814e8a831bfea35
YBL008W	HIR1	112	Subunit of the HIR complex	BY4742	DM1253	hir1∆	HIR1_Mutant_MNase	HIR1_quantifications_length_corrected.RDS	DM1253_sacCer3_m1_2019-09-16-23-43.bam	225aa79d18aff55c2e4a8bd61c78f82d
YBL016W	FUS3	113	Mitogen-activated serine/threonine protein kinase involved in mating	BY4742	DM1254	fus3∆	FUS3_Mutant_MNase	FUS3_quantifications_length_corrected.RDS	DM1254_sacCer3_m1_2019-09-16-21-22.bam	b33fbabf273e2b1404a482216eccf2a4
YBL021C	HAP3	114	Subunit of the Hap2p/3p/4p/5p CCAAT-binding complex	BY4742	DM1255	hap3∆	HAP3_Mutant_MNase	HAP3_quantifications_length_corrected.RDS	DM1255_sacCer3_m1_2019-09-16-20-59.bam	ae7f46f1bb1788477ca1e05f840afd13
YBL066C	SEF1	116	Putative transcription factor	BY4742	DM1256	sef1∆	SEF1_Mutant_MNase	SEF1_quantifications_length_corrected.RDS	DM1256_sacCer3_m1_2019-09-16-22-15.bam	68ab88972b95b4c1d57ec8c734874229
YBL079W	NUP170	117	Subunit of inner ring of nuclear pore complex (NPC)	BY4742	DM1257	nup170∆	NUP170_Mutant_MNase	NUP170_quantifications_length_corrected.RDS	DM1257_sacCer3_m1_2019-09-16-21-49.bam	389ca76552fa4440269574f9b8345b70
YGL013C	PDR1	118	Transcription factor that regulates the pleiotropic drug response	BY4742	DM1258	pdr1∆	PDR1_Mutant_MNase	PDR1_quantifications_length_corrected.RDS	DM1258_sacCer3_m1_2019-09-30-10-17.bam	294e7a8a3524d802e4a66d58d9fdeb97
YGL025C	PGD1	119	Subunit of the RNA polymerase II mediator complex	BY4742	DM1259	pgd1∆	PGD1_Mutant_MNase	PGD1_quantifications_length_corrected.RDS	DM1259_sacCer3_m1_2019-09-30-09-49.bam	392f2de7f4b6ca3a1225ae4080c8d03c
YGL035C	MIG1	120	Transcription factor involved in glucose repression	BY4742	DM1260	mig1∆	MIG1_Mutant_MNase	MIG1_quantifications_length_corrected.RDS	DM1260_sacCer3_m1_2019-09-30-10-44.bam	bc059fccf9b6697f1db26f29d735d49b
YGL071W	AFT1	121	Transcription factor involved in iron utilization and homeostasis	BY4742	DM1262	aft1∆	AFT1_Mutant_MNase	AFT1_quantifications_length_corrected.RDS	DM1262_sacCer3_m1_2019-09-30-11-07.bam	1608d8a50da857582949074fb52b4578
YGL090W	LIF1	122	Component of the DNA ligase IV complex	BY4742	DM1263	lif1∆	LIF1_Mutant_MNase	LIF1_quantifications_length_corrected.RDS	DM1263_sacCer3_m1_2019-09-30-11-37.bam	d7f469af195980f0941b7c9b1cb47f70
YNL229C	URE2	123	Nitrogen catabolite repression transcriptional regulator	BY4742	DM1264	ure2∆	URE2_Mutant_MNase	URE2_quantifications_length_corrected.RDS	DM1264_sacCer3_m1_2019-09-30-12-05.bam	30235108c8da6ebe827198e4668d5b62
YNL167C	SKO1	124	Basic leucine zipper transcription factor of the ATF/CREB family	BY4742	DM1265	sko1∆	SKO1_Mutant_MNase	SKO1_quantifications_length_corrected.RDS	DM1265_sacCer3_m1_2019-09-30-12-35.bam	e4a687210353e7559e1b6b7818f32e8c
YKR064W	OAF3	125	Putative transcriptional repressor with Zn(2)-Cys(6) finger	BY4742	DM1266	oaf3∆	OAF3_Mutant_MNase	OAF3_quantifications_length_corrected.RDS	DM1266_sacCer3_m1_2019-09-30-13-01.bam	b5c5d646d51eeb2449d1e4f4ef26cda6
YDR253C	MET32	126	Zinc-finger DNA-binding transcription factor	BY4742	DM1267	met32∆	MET32_Mutant_MNase	MET32_quantifications_length_corrected.RDS	DM1267_sacCer3_m1_2019-09-30-15-36.bam	2411f9be065d705eb26b10db34206d21
YDR259C	YAP6	127	Basic leucine zipper (bZIP) transcription factor	BY4742	DM1268	yap6∆	YAP6_Mutant_MNase	YAP6_quantifications_length_corrected.RDS	DM1268_sacCer3_m1_2019-09-30-15-00.bam	ec476ddf1cd09b7f5f4253cd450bb038
YDR310C	SUM1	128	Transcriptional repressor that regulates middle-sporulation genes	BY4742	DM1269	sum1∆	SUM1_Mutant_MNase	SUM1_quantifications_length_corrected.RDS	DM1269_sacCer3_m1_2019-09-30-15-18.bam	0799c5c67571d578fe31b45f077d137e
YDR321W	ASP1	129	Cytosolic L-asparaginase, involved in asparagine catabolism	BY4742	DM1270	asp1∆	ASP1_Mutant_MNase	ASP1_quantifications_length_corrected.RDS	DM1270_sacCer3_m1_2019-09-30-14-42.bam	b105f43d451db6589822a5662cb5b297
YIL076W	SEC28	131	Epsilon-COP subunit of the coatomer	BY4742	DM1272	sec28∆	SEC28_Mutant_MNase	SEC28_quantifications_length_corrected.RDS	DM1272_sacCer3_m1_2019-09-30-14-04.bam	c76f52e164e1c1b5d667dc5acbd280c0
YFL021W	GAT1	132	Transcriptional activator of nitrogen catabolite repression genes	BY4742	DM1273	gat1∆	GAT1_Mutant_MNase	GAT1_quantifications_length_corrected.RDS	DM1273_sacCer3_m1_2019-09-30-13-47.bam	b7b0e040b9cff687e09bcc280e6bc1fc
YFL031W	HAC1	133	Basic leucine zipper (bZIP) transcription factor (ATF/CREB1 homolog)	BY4742	DM1274	hac1∆	HAC1_Mutant_MNase	HAC1_quantifications_length_corrected.RDS	DM1274_sacCer3_m1_2019-09-30-13-29.bam	f23d86dce5857d68dd25f127e4a76375
YFL049W	SWP82	134	Member of the SWI/SNF chromatin remodeling complex	BY4742	DM1275	swp82∆	SWP82_Mutant_MNase	SWP82_quantifications_length_corrected.RDS	DM1275_sacCer3_m1_2019-10-02-12-35.bam	650198a2fc693bf22c1b7bb34330d027
YFL052W	ZNF1	135	Zinc cluster transcription factor that regulates respiratory growth	BY4742	DM1276	znf1∆	ZNF1_Mutant_MNase	ZNF1_quantifications_length_corrected.RDS	DM1276_sacCer3_m1_2019-10-02-11-47.bam	0a11969c7931bcb16beb96878a809025
YGR270W	YTA7	136	Protein that localizes to chromatin	BY4742	DM1277	yta7∆	YTA7_Mutant_MNase	YTA7_quantifications_length_corrected.RDS	DM1277_sacCer3_m1_2019-10-02-11-19.bam	552cb88065a1a5d63cb7d0adc0f48d61
YGR288W	MAL13	137	MAL-activator protein	BY4742	DM1278	mal13∆	MAL13_Mutant_MNase	MAL13_quantifications_length_corrected.RDS	DM1278_sacCer3_m1_2019-10-02-15-15.bam	c1643023199daf9703981bee1446c46f
YIR017C	MET28	138	bZIP transcriptional activator in the Cbf1p-Met4p-Met28p complex	BY4742	DM1279	met28∆	MET28_Mutant_MNase	MET28_quantifications_length_corrected.RDS	DM1279_sacCer3_m1_2019-10-02-14-48.bam	0c6d433b31b0fbb35c94be2cf22ffc3c
YIR018W	YAP5	139	Basic leucine zipper (bZIP) iron-sensing transcription factor	BY4742	DM1280	yap5∆	YAP5_Mutant_MNase	YAP5_quantifications_length_corrected.RDS	DM1280_sacCer3_m1_2019-10-02-13-59.bam	336485d725e7aea3550fe8a3d9acb126
YMR070W	MOT3	140	Transcriptional repressor, activator	BY4742	DM1281	mot3∆	MOT3_Mutant_MNase	MOT3_quantifications_length_corrected.RDS	DM1281_sacCer3_m1_2019-10-02-14-24.bam	638eb9456400ea1bc0a451163dd8c594
YOL089C	HAL9	142	Putative transcription factor containing a zinc finger	BY4742	DM1201	hal9∆	HAL9_Mutant_MNase	HAL9_quantifications_length_corrected.RDS	DM1201_sacCer3_m1_2019-08-05-11-35.bam	6fda1177899c3abe864849fc6292a577
YOL108C	INO4	143	Transcription factor involved in phospholipid synthesis	BY4742	DM1202	ino4∆	INO4_Mutant_MNase	INO4_quantifications_length_corrected.RDS	DM1202_sacCer3_m1_2019-08-05-10-39.bam	ec7fccdf7e5a6d297e06468d86d214bc
YML099C	ARG81	144	Zinc finger transcription factor involved in arginine-responsive genes	BY4742	DM1203	arg81∆	ARG81_Mutant_MNase	ARG81_quantifications_length_corrected.RDS	DM1203_sacCer3_m1_2019-08-05-10-58.bam	657ebbbbe9ab560a0830b1e5d39b50b2
YPR052C	NHP6A	145	High-mobility group (HMG) protein	BY4742	DM1204	nhp6a∆	NHP6A_Mutant_MNase	NHP6A_quantifications_length_corrected.RDS	DM1204_sacCer3_m1_2019-08-05-11-58.bam	c927f0ed34465b7b3f7382243e8f754e
YPR054W	SMK1	146	Middle sporulation-specific mitogen-activated protein kinase (MAPK)	BY4742	DM1058	smk1∆	SMK1_Mutant_MNase	SMK1_quantifications_length_corrected.RDS	DM1058_sacCer3_m1_2019-04-05-21-46.bam	84a8f10dac12887a5e27fc9f8da1140f
YPR065W	ROX1	147	Heme-dependent repressor of hypoxic genes	BY4742	DM1059	rox1∆	ROX1_Mutant_MNase	ROX1_quantifications_length_corrected.RDS	DM1059_sacCer3_m1_2019-04-05-22-13.bam	7f4990ed0f479038011b7c3b34a52cad
YPR070W	MED1	148	Subunit of the RNA polymerase II mediator complex	BY4742	DM1060	med1∆	MED1_Mutant_MNase	MED1_quantifications_length_corrected.RDS	DM1060_sacCer3_m1_2019-04-05-22-40.bam	cab239b659eecbb1e430595613e8b966
YJL110C	GZF3	149	GATA zinc finger protein	BY4742	DM1061	gzf3∆	GZF3_Mutant_MNase	GZF3_quantifications_length_corrected.RDS	DM1061_sacCer3_m1_2019-04-05-23-02.bam	6115f0533d2809c291a79fca7aa0af6a
YJL089W	SIP4	150	C6 zinc cluster transcriptional activator	BY4742	DM1062	sip4∆	SIP4_Mutant_MNase	SIP4_quantifications_length_corrected.RDS	DM1062_sacCer3_m1_2019-04-05-23-25.bam	2dc784e5b28e7d0f3541d34fc760bca6
YJL056C	ZAP1	151	Zinc-regulated transcription factor	BY4742	DM1063	zap1∆	ZAP1_Mutant_MNase	ZAP1_quantifications_length_corrected.RDS	DM1063_sacCer3_m1_2019-04-06-00-00.bam	1010c89993a971cbe9468cf5fe007476
YJR127C	RSF2	152	Zinc-finger protein	BY4742	DM1064	rsf2∆	RSF2_Mutant_MNase	RSF2_quantifications_length_corrected.RDS	DM1064_sacCer3_m1_2019-04-06-00-39.bam	abc40d12b82a1ff540598285f5baf704
YER063W	THO1	154	Conserved nuclear RNA-binding protein	BY4742	DM1069	tho1∆	THO1_Mutant_MNase	THO1_quantifications_length_corrected.RDS	DM1069_sacCer3_m1_2019-04-06-02-59.bam	e5c6bb91e90c09a068a98b6e6e64162e
YHR006W	STP2	155	Transcription factor	BY4742	DM1070	stp2∆	STP2_Mutant_MNase	STP2_quantifications_length_corrected.RDS	DM1070_sacCer3_m1_2019-04-06-03-23.bam	33388e8515b3181b16fd3b311bbc638b
YHR041C	SRB2	156	Subunit of the RNA polymerase II mediator complex	BY4742	DM1071	srb2∆	SRB2_Mutant_MNase	SRB2_quantifications_length_corrected.RDS	DM1071_sacCer3_m1_2019-04-06-03-47.bam	482b03db47b20dfaf54911c025dc3887
YKR099W	BAS1	157	Myb-related transcription factor	BY4742	DM1072	bas1∆	BAS1_Mutant_MNase	BAS1_quantifications_length_corrected.RDS	DM1072_sacCer3_m1_2019-04-06-04-15.bam	4f10a12064caf2510fb694c866b7e7cd
YKR101W	SIR1	158	Protein involved in silencing at mating-type loci HML and HMR	BY4742	DM1073	sir1∆	SIR1_Mutant_MNase	SIR1_quantifications_length_corrected.RDS	DM1073_sacCer3_m1_2019-04-06-04-40.bam	d033f418c815caf32736579e6dae0814
YJR104C	SOD1	159	Cytosolic copper-zinc superoxide dismutase	BY4742	DM1074	sod1∆	SOD1_Mutant_MNase	SOD1_quantifications_length_corrected.RDS	DM1074_sacCer3_m1_2019-04-06-05-02.bam	43c44d84a31eb0282f7e2d02a789169f
YJR119C	JHD2	160	JmjC domain family histone demethylase	BY4742	DM1075	jhd2∆	JHD2_Mutant_MNase	JHD2_quantifications_length_corrected.RDS	DM1075_sacCer3_m1_2019-04-06-05-25.bam	800964ce1c9db2f559edfb1e628e2723
YJR140C	HIR3	161	Subunit of the HIR complex	BY4742	DM1076	hir3∆	HIR3_Mutant_MNase	HIR3_quantifications_length_corrected.RDS	DM1076_sacCer3_m1_2019-04-06-05-49.bam	b0daaeb40be210dd4f2997985535296e
YKL005C	BYE1	162	Negative regulator of transcription elongation	BY4742	DM1077	bye1∆	BYE1_Mutant_MNase	BYE1_quantifications_length_corrected.RDS	DM1077_sacCer3_m1_2019-04-06-06-14.bam	bb16e8362d274b1c71cddbdb3a586b20
YMR136W	GAT2	163	Protein containing GATA family zinc finger motifs	BY4742	DM1065	gat2∆	GAT2_Mutant_MNase	GAT2_quantifications_length_corrected.RDS	DM1065_sacCer3_m1_2019-04-06-01-05.bam	2327194d6a5042278db52da8624aef36
YMR172W	HOT1	164	Transcription factor for glycerol biosynthetic genes	BY4742	DM1078	hot1∆	HOT1_Mutant_MNase	HOT1_quantifications_length_corrected.RDS	DM1078_sacCer3_m1_2019-04-06-06-40.bam	9b32d75ebee62bb4ade5311dae85a139
YDR034C	LYS14	165	Transcriptional activator involved in regulating lysine biosynthesis	BY4742	DM1079	lys14∆	LYS14_Mutant_MNase	LYS14_quantifications_length_corrected.RDS	DM1079_sacCer3_m1_2019-04-06-07-06.bam	7195cd4b995960631fef3a9be506fd17
YDR043C	NRG1	166	Transcriptional repressor	BY4742	DM1080	nrg1∆	NRG1_Mutant_MNase	NRG1_quantifications_length_corrected.RDS	DM1080_sacCer3_m1_2019-04-06-07-36.bam	76ade12b8b56454335d48119004f7699
YBR279W	PAF1	167	Component of the Paf1p complex involved in transcription elongation	BY4742	DM1081	paf1∆	PAF1_Mutant_MNase	PAF1_quantifications_length_corrected.RDS	DM1081_sacCer3_m1_2019-04-06-07-59.bam	6440e1479dfee5419319e86ae8c55d3c
YBR297W	MAL33	168	MAL-activator protein	BY4742	DM1082	mal33∆	MAL33_Mutant_MNase	MAL33_quantifications_length_corrected.RDS	DM1082_sacCer3_m1_2019-04-06-08-24.bam	a31259b5188a16f6398048f0fef29026
YCR020W-B	HTL1	169	Component of the RSC chromatin remodeling complex	BY4742	DM1083	htl1∆	HTL1_Mutant_MNase	HTL1_quantifications_length_corrected.RDS	DM1083_sacCer3_m1_2019-04-06-08-46.bam	ec650a7bc645d1a1295dba9e678572a1
YCR065W	HCM1	170	Forkhead transcription factor	BY4742	DM1084	hcm1∆	HCM1_Mutant_MNase	HCM1_quantifications_length_corrected.RDS	DM1084_sacCer3_m1_2019-04-06-09-03.bam	b876e07ecb3ffc00c50c038c3b1029c7
YCR077C	PAT1	171	Deadenylation-dependent mRNA-decapping factor	BY4742	DM1085	pat1∆	PAT1_Mutant_MNase	PAT1_quantifications_length_corrected.RDS	DM1085_sacCer3_m1_2019-04-06-09-28.bam	7134be4b17f2cfad7c6cd3ae29636b9c
YCR081W	SRB8	172	Subunit of the RNA polymerase II mediator complex	BY4742	DM1086	srb8∆	SRB8_Mutant_MNase	SRB8_quantifications_length_corrected.RDS	DM1086_sacCer3_m1_2019-04-06-09-52.bam	d44ae19bcf211f9be50a204e752b923c
YJR060W	CBF1	173	Basic helix-loop-helix (bHLH) protein	BY4742	DM1087	cbf1∆	CBF1_Mutant_MNase	CBF1_quantifications_length_corrected.RDS	DM1087_sacCer3_m1_2019-04-06-10-17.bam	66a7bfddab9c123cfe6941a1be4db55d
YDL106C	PHO2	174	Homeobox transcription factor	BY4742	DM1103	pho2∆	PHO2_Mutant_MNase	PHO2_quantifications_length_corrected.RDS	DM1103_sacCer3_m1_2019-05-07-14-48.bam	30f71f9881c5220279b32d776103710d
YDL160C	DHH1	175	Cytoplasmic DEAD-box helicase, stimulates mRNA decapping	BY4742	DM1104	dhh1∆	DHH1_Mutant_MNase	DHH1_quantifications_length_corrected.RDS	DM1104_sacCer3_m1_2019-05-07-15-46.bam	4d25bc77a7d4cd87bcb9b932eaa0e4e2
YDL170W	UGA3	176	Transcriptional activator for GABA-dependent induction of GABA genes	BY4742	DM1105	uga3∆	UGA3_Mutant_MNase	UGA3_quantifications_length_corrected.RDS	DM1105_sacCer3_m1_2019-05-07-15-29.bam	331e61401e224664ae87d2ce8f0b74fc
YGL096W	TOS8	177	Homeodomain-containing protein and putative transcription factor	BY4742	DM1205	tos8∆	TOS8_Mutant_MNase	TOS8_quantifications_length_corrected.RDS	DM1205_sacCer3_m1_2019-08-05-12-31.bam	8844729cc6c503f3af1613fd763de6be
YBL103C	RTG3	178	bHLH/Zip transcription factor for retrograde (RTG) and TOR pathways	BY4742	DM1106	rtg3∆	RTG3_Mutant_MNase	RTG3_quantifications_length_corrected.RDS	DM1106_sacCer3_m1_2019-05-07-16-23.bam	f947c7ff29a3902e33a6b54814d113b4
YBR010W	HHT1	179	Histone H3	BY4742	DM1107	hht1∆	HHT1_Mutant_MNase	HHT1_quantifications_length_corrected.RDS	DM1107_sacCer3_m1_2019-05-07-16-03.bam	0dcb985f68f63e2d6371e998618df671
YBR033W	EDS1	180	Putative zinc cluster protein, predicted to be a transcription factor	BY4742	DM1108	eds1∆	EDS1_Mutant_MNase	EDS1_quantifications_length_corrected.RDS	DM1108_sacCer3_m1_2019-05-07-14-27.bam	395aca261e6498d9359da400ba845de9
YBR066C	NRG2	181	Transcriptional repressor	BY4742	DM1109	nrg2∆	NRG2_Mutant_MNase	NRG2_quantifications_length_corrected.RDS	DM1109_sacCer3_m1_2019-05-07-14-10.bam	bdc56886490ed0cca13837630f406dfc
YNL023C	FAP1	182	Protein that binds to Fpr1p	BY4742	DM1110	fap1∆	FAP1_Mutant_MNase	FAP1_quantifications_length_corrected.RDS	DM1110_sacCer3_m1_2019-05-23-20-32.bam	53fee704b0a5e333e87ad77b9e405ed8
YNL027W	CRZ1	183	Transcription factor, activates transcription of stress response genes	BY4742	DM1111	crz1∆	CRZ1_Mutant_MNase	CRZ1_quantifications_length_corrected.RDS	DM1111_sacCer3_m1_2019-05-23-21-11.bam	e1dd2af7cce92d072572274d94082044
YNR010W	CSE2	184	Subunit of the RNA polymerase II mediator complex	BY4742	DM1055	cse2∆	CSE2_Mutant_MNase	CSE2_quantifications_length_corrected.RDS	DM1055_sacCer3_m1_2019-03-04-15-26.bam	300a4ab21da69626eabbbe7579c4ec4a
YIL101C	XBP1	185	Transcriptional repressor	BY4742	DM1112	xbp1∆	XBP1_Mutant_MNase	XBP1_quantifications_length_corrected.RDS	DM1112_sacCer3_m1_2019-05-23-19-23.bam	6ce353cafd6bdd42a4bac1dc5f938f0b
YIL130W	ASG1	186	Zinc cluster protein proposed to be a transcriptional regulator	BY4742	DM1113	asg1∆	ASG1_Mutant_MNase	ASG1_quantifications_length_corrected.RDS	DM1113_sacCer3_m1_2019-05-23-19-51.bam	d066c720b0186e82c7b334f536f193c9
YIR013C	GAT4	187	Protein containing GATA family zinc finger motifs	BY4742	DM1114	gat4∆	GAT4_Mutant_MNase	GAT4_quantifications_length_corrected.RDS	DM1114_sacCer3_m1_2019-05-23-22-50.bam	9414d8a3c8b8bd6a604144826adbbac6
YFR013W	IOC3	188	Subunit of the Isw1a complex	BY4742	DM1282	ioc3∆	IOC3_Mutant_MNase	IOC3_quantifications_length_corrected.RDS	DM1282_sacCer3_m1_2019-10-02-13-19.bam	d25f4b32e23e88670d04762c6af8fd73
YNL068C	FKH2	189	Forkhead family transcription factor	BY4742	DM1283	fkh2∆	FKH2_Mutant_MNase	FKH2_quantifications_length_corrected.RDS	DM1283_sacCer3_m1_2019-10-02-17-50.bam	cc74e648c85d956aeb5b93be3a2adfd7
YGR040W	KSS1	190	Mitogen-activated protein kinase (MAPK)	BY4742	DM1284	kss1∆	KSS1_Mutant_MNase	KSS1_quantifications_length_corrected.RDS	DM1284_sacCer3_m1_2019-10-02-19-09.bam	34995ff46b1699deda15c5f4bd55f2d1
YGR063C	SPT4	191	Spt4p/5p (DSIF) transcription elongation factor complex subunit	BY4742	DM1285	spt4∆	SPT4_Mutant_MNase	SPT4_quantifications_length_corrected.RDS	DM1285_sacCer3_m1_2019-10-02-19-40.bam	bd0929969aa90b54bcb8ac1ab4097213
YKR034W	DAL80	192	Negative regulator of genes in multiple nitrogen degradation pathways	BY4742	DM1286	dal80∆	DAL80_Mutant_MNase	DAL80_quantifications_length_corrected.RDS	DM1286_sacCer3_m1_2019-10-02-18-13.bam	28ad0fec7f32f1fb28dffd7a4ba82fa3
YBR083W	TEC1	193	Transcription factor targeting filamentation genes and Ty1 expression	BY4742	DM1287	tec1∆	TEC1_Mutant_MNase	TEC1_quantifications_length_corrected.RDS	DM1287_sacCer3_m1_2019-10-02-18-44.bam	86aef27918639d9c08c20e304731a8c9
YBR112C	CYC8	194	General transcriptional co-repressor	BY4742	DM1329	cyc8∆	CYC8_Mutant_MNase	CYC8_quantifications_length_corrected.RDS	DM1329_sacCer3_m1_2019-10-21-15-46.bam	ba70ad03b3083b24ccb842cd820cf537
YBR150C	TBS1	195	Protein of unknown function	BY4742	DM1288	tbs1∆	TBS1_Mutant_MNase	TBS1_quantifications_length_corrected.RDS	DM1288_sacCer3_m1_2019-10-02-16-47.bam	61629e3a27d8f433c8c5a1be5edc50b3
YLR394W	CST9	196	SUMO E3 ligase	BY4742	DM1289	cst9∆	CST9_Mutant_MNase	CST9_quantifications_length_corrected.RDS	DM1289_sacCer3_m1_2019-10-02-17-18.bam	59d3dc3b6ce5d24381bd749f3c518195
YML041C	VPS71	197	Nucleosome-binding component of the SWR1 complex	BY4742	DM1290	vps71∆	VPS71_Mutant_MNase	VPS71_quantifications_length_corrected.RDS	DM1290_sacCer3_m1_2019-10-02-20-08.bam	d1569d4f4206fd77f159b2a108fce02c
YML076C	WAR1	198	Homodimeric Zn2Cys6 zinc finger transcription factor	BY4742	DM1330	war1∆	WAR1_Mutant_MNase	WAR1_quantifications_length_corrected.RDS	DM1330_sacCer3_m1_2019-10-21-16-43.bam	fc2c7443395402ba7ce020aeb2d397ac
YIR023W	DAL81	200	Positive regulator of genes in multiple nitrogen degradation pathways	BY4742	DM1323	dal81∆	DAL81_Mutant_MNase	DAL81_quantifications_length_corrected.RDS	DM1323_sacCer3_m1_2019-10-21-13-37.bam	24e9486add40c160feca6d1095544db2
YOR298C-A	MBF1	201	Transcriptional coactivator	BY4742	DM1324	mbf1∆	MBF1_Mutant_MNase	MBF1_quantifications_length_corrected.RDS	DM1324_sacCer3_m1_2019-10-21-14-39.bam	f8d0e9c478a1aff0500a062664362d22
YMR037C	MSN2	202	Stress-responsive transcriptional activator	BY4742	DM1325	msn2∆	MSN2_Mutant_MNase	MSN2_quantifications_length_corrected.RDS	DM1325_sacCer3_m1_2019-10-21-13-58.bam	5ab0537bf3c4315db32a890fd79f0ef1
YPR007C	REC8	203	Meiosis-specific component of the sister chromatid cohesion complex	BY4742	DM1326	rec8∆	REC8_Mutant_MNase	REC8_quantifications_length_corrected.RDS	DM1326_sacCer3_m1_2019-10-21-15-25.bam	10e7db67803b741428dc0c4a28133704
YPR008W	HAA1	204	Transcriptional activator involved in adaptation to weak acid stress	BY4742	DM1327	haa1∆	HAA1_Mutant_MNase	HAA1_quantifications_length_corrected.RDS	DM1327_sacCer3_m1_2019-10-21-15-02.bam	ee34f70c0f4427239cc312c93dae76d1
YDL020C	RPN4	205	Transcription factor that stimulates expression of proteasome genes	BY4742	DM1328	rpn4∆	RPN4_Mutant_MNase	RPN4_quantifications_length_corrected.RDS	DM1328_sacCer3_m1_2019-10-21-16-10.bam	f5409c05fbaf627960ffebf0c29e9b44
YDL056W	MBP1	206	Transcription factor	BY4742	DM1331	mbp1∆	MBP1_Mutant_MNase	MBP1_quantifications_length_corrected.RDS	DM1331_sacCer3_m1_2019-10-22-14-01.bam	6deb6928c1d15d4fdf557240fdf808e0
YDR443C	SSN2	207	Subunit of the RNA polymerase II mediator complex	BY4742	DM1332	ssn2∆	SSN2_Mutant_MNase	SSN2_quantifications_length_corrected.RDS	DM1332_sacCer3_m1_2019-10-22-13-07.bam	0093607d9ce4d01a438121fb5581a0f1
YDR448W	ADA2	208	Transcription coactivator	BY4742	DM1333	ada2∆	ADA2_Mutant_MNase	ADA2_quantifications_length_corrected.RDS	DM1333_sacCer3_m1_2019-10-22-13-29.bam	edd8805daf77e92fca935addf2d73942
YDR463W	STP1	209	Transcription factor	BY4742	DM1334	stp1∆	STP1_Mutant_MNase	STP1_quantifications_length_corrected.RDS	DM1334_sacCer3_m1_2019-10-22-15-28.bam	0d1e42f2e3ee6aa77b4cf41b1752c516
YDR501W	PLM2	210	Putative transcription factor, contains Forkhead Associated domain	BY4742	DM1359	plm2∆	PLM2_Mutant_MNase	PLM2_quantifications_length_corrected.RDS	DM1359_sacCer3_m1_2019-11-29-15-07.bam	ea5b0c0e81f906bd94d9b3cab1f4e25f
YDR520C	URC2	211	Putative Zn(II)2Cys6 motif containing transcription factor	BY4742	DM1336	urc2∆	URC2_Mutant_MNase	URC2_quantifications_length_corrected.RDS	DM1336_sacCer3_m1_2019-10-22-14-29.bam	7b53e046c97e319b0bfc04348736a38b
YGL127C	SOH1	212	Subunit of the RNA polymerase II mediator complex	BY4742	DM1337	soh1∆	SOH1_Mutant_MNase	SOH1_quantifications_length_corrected.RDS	DM1337_sacCer3_m1_2019-10-22-14-56.bam	6a9e89cb251f982e42d71a55aa94a0a8
YGL131C	SNT2	213	Subunit of Snt2C complex, RING finger ubiquitin ligase (E3)	BY4742	DM1360	snt2∆	SNT2_Mutant_MNase	SNT2_quantifications_length_corrected.RDS	DM1360_sacCer3_m1_2019-11-29-14-25.bam	ae68bfbc96cfd1ac350d80024ff0bba7
YGL151W	NUT1	214	Component of the RNA polymerase II mediator complex	BY4742	DM1338	nut1∆	NUT1_Mutant_MNase	NUT1_quantifications_length_corrected.RDS	DM1338_sacCer3_m1_2019-10-22-16-23.bam	d115e850112eb4fe4ebae79aeccbb6f8
YGL162W	SUT1	215	Zn(II)2Cys6 family transcription factor	BY4742	DM1339	sut1∆	SUT1_Mutant_MNase	SUT1_quantifications_length_corrected.RDS	DM1339_sacCer3_m1_2019-10-23-17-05.bam	c1decd522c9abc0f1f76344e5dec6bb4
YGL166W	CUP2	216	Copper-binding transcription factor	BY4742	DM1340	cup2∆	CUP2_Mutant_MNase	CUP2_quantifications_length_corrected.RDS	DM1340_sacCer3_m1_2019-10-23-16-29.bam	e44cbc4798c00bcadd285b84a4e08b41
YGL173C	XRN1	217	Evolutionarily-conserved 5'-3' exonuclease	BY4742	DM1341	xrn1∆	XRN1_Mutant_MNase	XRN1_quantifications_length_corrected.RDS	DM1341_sacCer3_m1_2019-10-23-16-08.bam	e00d6523793515a119159144dea10d67
YER109C	FLO8	218	Transcription factor	BY4742	DM1361	flo8∆	FLO8_Mutant_MNase	FLO8_quantifications_length_corrected.RDS	DM1361_sacCer3_m1_2019-11-29-15-28.bam	95ca64b4cde9fb5f19336251a531ca2b
YER111C	SWI4	219	DNA binding component of the SBF complex (Swi4p-Swi6p)	BY4742	DM1342	swi4∆	SWI4_Mutant_MNase	SWI4_quantifications_length_corrected.RDS	DM1342_sacCer3_m1_2019-10-23-15-41.bam	bbfa4d2bd7e201fb0fa9b0024606d3e1
YER164W	CHD1	220	Chromatin remodeler that regulates various aspects of transcription	BY4742	DM1343	chd1∆	CHD1_Mutant_MNase	CHD1_quantifications_length_corrected.RDS	DM1343_sacCer3_m1_2019-10-23-15-13.bam	7ec598db7a475735806c7ddc09eaea49
YER173W	RAD24	221	Checkpoint protein	BY4742	DM1344	rad24∆	RAD24_Mutant_MNase	RAD24_quantifications_length_corrected.RDS	DM1344_sacCer3_m1_2019-10-23-14-54.bam	6e76b84106564762b9535a0da5de6f74
YER184C	TOG1	222	Transcriptional activator of oleate genes	BY4742	DM1347	tog1∆	TOG1_Mutant_MNase	TOG1_quantifications_length_corrected.RDS	DM1347_sacCer3_m1_2019-11-21-15-42.bam	1ac7bd6cd2009fff3cafd73b642f7ab8
YIL131C	FKH1	223	Forkhead family transcription factor	BY4742	DM1345	fkh1∆	FKH1_Mutant_MNase	FKH1_quantifications_length_corrected.RDS	DM1345_sacCer3_m1_2019-10-23-14-27.bam	0428257cf18f2eb4d811dc0d192aa486
YIL056W	VHR1	224	Transcriptional activator	BY4742	DM1346	vhr1∆	VHR1_Mutant_MNase	VHR1_quantifications_length_corrected.RDS	DM1346_sacCer3_m1_2019-10-23-14-00.bam	f6b58dadee1f4303a90ed378b642a015
YLR357W	RSC2	225	Component of the RSC chromatin remodeling complex	BY4742	DM1348	rsc2∆	RSC2_Mutant_MNase	RSC2_quantifications_length_corrected.RDS	DM1348_sacCer3_m1_2019-11-21-16-59.bam	786f14951b99eeb01db4aa977beecc7e
YJL103C	GSM1	226	Putative zinc cluster protein of unknown function	BY4742	DM1349	gsm1∆	GSM1_Mutant_MNase	GSM1_quantifications_length_corrected.RDS	DM1349_sacCer3_m1_2019-11-21-16-16.bam	70572f8957e2de9fdabf113f7cfa9d60
YMR021C	MAC1	228	Copper-sensing transcription factor	BY4742	DM1350	mac1∆	MAC1_Mutant_MNase	MAC1_quantifications_length_corrected.RDS	DM1350_sacCer3_m1_2019-11-21-17-27.bam	1d2ce71fb99dbdefd965baaed6532df9
YJL124C	LSM1	229	Lsm (Like Sm) protein	BY4742	DM1351	lsm1∆	LSM1_Mutant_MNase	LSM1_quantifications_length_corrected.RDS	DM1351_sacCer3_m1_2019-11-21-17-55.bam	6987b5c6e28164c7869718deb4e07f2e
YLR399C	BDF1	233	Protein involved in transcription initiation	BY4742	DM1353	bdf1∆	BDF1_Mutant_MNase	BDF1_quantifications_length_corrected.RDS	DM1353_sacCer3_m1_2019-11-21-18-53.bam	0ef211f769d79474878fc8bbfa9f9f11
