# Supplementary material for: Genome-wide nucleosome and transcription factor responses to genetic perturbations reveal chromatin-mediated mechanisms of transcriptional regulation
Source: HighWire-hosted journal article supplement (doi:10.1101/gr.279637.124), 2025-12-09
Supplement: Supplemental_Table_S2.xlsx [file Supplemental_Table_S2.xlsx]

## Sheet: Sheet1
Supplemental Table S2
List of 19 mutants verified with two additional biological replicates in our study. Column descriptions:
ORF - Open reading frame identifier in SGD
Gene - Canonical gene symbol
Description - Gene description from SGD
Strain - Strain of yeast (Saccharomyces cerevisiae) used in this study
DMID - Internal sample ID for the original mutant
Rep1_DMID - Internal sample ID for replicate #1
Rep2_DMID - Internal sample ID for replicates #2
Genotype - Genotype of yeast, denoted as mutants
ORF	Gene	Description	Strain	DMID	Rep1_DMID	Rep2_DMID	Genotype
YML051W	GAL80	Transcriptional regulator involved in the repression of GAL genes	BY4742	DM1056	DM1704	DM1709	gal80Δ
YJR060W	CBF1	Basic helix-loop-helix (bHLH) protein	BY4742	DM1087	DM1705	DM1710	cbf1Δ
YKR099W	BAS1	Myb-related transcription factor	BY4742	DM1072	DM1706	DM1711	bas1Δ
YML099C	ARG81	Zinc finger transcription factor involved in arginine-responsive genes	BY4742	DM1203	DM1707	DM1712	arg81Δ
YMR042W	ARG80	Transcription factor involved in regulating arginine-responsive genes	BY4742	DM966	DM1708	DM1713	arg80Δ
YLR014C	PPR1	Zinc finger transcription factor	BY4742	DM1355	DM1727	DM1736	ppr1Δ
YDR310C	SUM1	Transcriptional repressor that regulates middle-sporulation genes	BY4742	DM1269	DM1731	DM1740	sum1Δ
YLR131C	ACE2	Transcription factor required for septum destruction after cytokinesis	BY4742	DM1091	DM1716	DM1721	ace2Δ
YLR176C	RFX1	Major transcriptional repressor of DNA-damage-regulated genes	BY4742	DM1092	DM1729	DM1738	rfx1Δ
YLR357W	RSC2	Component of the RSC chromatin remodeling complex	BY4742	DM1348	DM1725	DM1734	rsc2Δ
YDR448W	ADA2	Transcription coactivator	BY4742	DM1333	DM1732	DM1741	ada2Δ
YLR182W	SWI6	Transcription cofactor	BY4742	DM1036	DM1717	DM1722	swi6Δ
YNR010W	CSE2	Subunit of the RNA polymerase II mediator complex	BY4742	DM1055	DM1726	DM1735	cse2Δ
YHR206W	SKN7	Nuclear response regulator and transcription factor	BY4742	DM1115	DM1718	DM1723	skn7Δ
YGL237C	HAP2	Subunit of the Hap2p/3p/4p/5p CCAAT-binding complex	BY4742	DM1051	DM1724	DM1733	hap2Δ
YPR065W	ROX1	Heme-dependent repressor of hypoxic genes	BY4742	DM1059	DM1714	DM1719	rox1Δ
YDL056W	MBP1	Transcription factor	BY4742	DM1331	DM1728	DM1737	mbp1Δ
YNL229C	URE2	Nitrogen catabolite repression transcriptional regulator	BY4742	DM1264	DM1730	DM1739	ure2Δ
YER111C	SWI4	DNA binding component of the SBF complex (Swi4p-Swi6p)	BY4742	DM1342	DM1715	DM1720	swi4Δ
