# Supplementary material for: Genome-wide nucleosome and transcription factor responses to genetic perturbations reveal chromatin-mediated mechanisms of transcriptional regulation
Source: HighWire-hosted journal article supplement (doi:10.1101/gr.279637.124), 2025-12-09
Supplement: Supplemental_Table_S3.xlsx [file Supplemental_Table_S3.xlsx]

## Sheet: Sheet1
Supplemental Table S3
Table of all 234 original mutant strains considered in the study. After performing quality control checks, 201 strains were used in the manuscript.
# Screened	234
# Sequenced	226
# Passed QC	201
Duke Deletion Collection															UNC Deletion Collection
orf_name	gene_name	sample_id	plate	row	column	description	record_number	strain	batch	sequenced	library_quality	genotype	sample_id	notes	unc_derived_replicate	pcr	sequenced	genotype	sample_id
YAL051W	OAF1	1	101	B	2	Oleate-activated transcription factor	10355	BY4739	01_1	y	y	y	926
YAL034C	FUN19	2	101	C	2	Non-essential protein of unknown function	10374	BY4739	01_1	y	y	y	927
YAL019W	FUN30	3	101	C	12	Snf2p family member with ATP-dependent chromatin remodeling activity	10389	BY4739	01_1	y	y	y	928
YLR013W	GAT3	4	102	B	8	Protein containing GATA family zinc finger motifs	11568	BY4742	12_1	y	y	y	929
YLR014C	PPR1	5	102	B	9	Zinc finger transcription factor	11569	BY4742	12_1	y	y	y	1355		y	y	y	y	1727, 1736
YLR055C	SPT8	6	102	D	6	Subunit of the SAGA transcriptional regulatory complex	12666	BY4742	12_2	y	y	y	1356
YLR085C	ARP6	7	102	F	3	Actin-related protein that binds nucleosomes	12696	BY4742	12_2	y	y	y	1357
YLR095C	IOC2	8	102	F	10	Subunit of the Isw1b complex	12706	BY4742	12_2	y	y	y	1358
YLR098C	CHA4	9	102	G	1	DNA binding transcriptional activator	12709	BY4742	12_2	y	y	y	930
YLR113W	HOG1	10	102	G	10	Mitogen-activated protein kinase involved in osmoregulation	12724	BY4742	12_2	y	y	y	931
YML081W	TDA9	11	103	A	4	Transcription factor that regulates acetate production	10489	BY4739	13_1	y	y	y	1242
YML051W	GAL80	12	103	B	8	Transcriptional regulator involved in the repression of GAL genes	10520	BY4742	13_1	y	y	y	1056		y	y	y	y	1704, 1709
YML007W	YAP1	13	103	D	11	Basic leucine zipper (bZIP) transcription factor	10569	BY4742	13_2	y	y	n
YMR016C	SOK2	14	103	F	3	Nuclear protein that negatively regulates pseudohyphal differentiation	10591	BY4742	13_2	y	y	n
YMR019W	STB4	15	103	F	6	Putative transcription factor	10594	BY4742	13_2	y	y	y	964
YMR039C	SUB1	16	103	G	9	Transcriptional regulator	10615	BY4742	13_2	y	y	y	965
YMR042W	ARG80	17	103	G	12	Transcription factor involved in regulating arginine-responsive genes	10618	BY4742	13_2	y	y	y	966		y	y	y	y	1708, 1713
YMR164C	MSS11	18	104	A	10	Transcription factor	10747	BY4742	13_4	y	y	y	1123
YMR176W	ECM5	19	104	B	7	Subunit of the Snt2C complex	10761	BY4742	13_4	y	y	y	1124
YMR182C	RGM1	20	104	B	12	Putative zinc finger DNA binding transcription factor	10767	BY4742	13_4	y	y	y	1125
YMR280C	CAT8	21	104	H	9	Zinc cluster transcriptional activator	10866	BY4742	13_5	y	y	y	1126
YNL314W	DAL82	22	105	D	2	Positive regulator of allophanate inducible genes	11130	BY4742	14_1	y	y	y	1171
YNL257C	SIP3	23	105	F	12	Putative sterol transfer protein	11187	BY4742	14_1	y	y	y	1172
YOR028C	CIN5	24	106	A	10	Basic leucine zipper (bZIP) transcription factor of the yAP-1 family	11804	BY4742	15_1
YOR032C	HMS1	25	106	B	2	bHLH protein with similarity to myc-family transcription factors	11808	BY4742	15_1	y	y	y	1173
YOR038C	HIR2	26	106	B	8	Subunit of HIR nucleosome assembly complex	11814	BY4742	15_1	y	y	y	1174
YOR295W	UAF30	27	106	F	12	Subunit of UAF (upstream activation factor) complex	11591	BY4742	15_4
YOR304W	ISW2	28	106	G	9	ATP-dependent DNA translocase involved in chromatin remodeling	11601	BY4742	15_4
YOR337W	TEA1	29	107	A	4	Ty1 enhancer activator involved in Ty enhancer-mediated transcription	11634	BY4742	15_4	y	y	y	1127
YOR344C	TYE7	30	107	A	10	Serine-rich protein that contains a bHLH DNA binding motif	11641	BY4742	15_4	y	y	y	1175
YOR358W	HAP5	31	107	B	10	Subunit of the Hap2p/3p/4p/5p CCAAT-binding complex	11655	BY4742	15_4	y	y	y	1176
YOR363C	PIP2	32	107	C	1	Autoregulatory, oleate-activated transcription factor	11660	BY4742	15_4	y	y	y	1177
YOR380W	RDR1	33	107	C	10	Transcriptional repressor involved in regulating multidrug resistance	11677	BY4742	15_4	y	y	y	1182
YOL051W	GAL11	34	107	G	8	Subunit of the RNA polymerase II mediator complex	11742	BY4742	15_5	y	y	n	1243	Neighboring SPE2 deleted instead of GAL11
YOL067C	RTG1	35	108	A	1	Transcription factor (bHLH) involved in interorganelle communication	11759	BY4742	15_5	y	y	n
YPL254W	HFI1	36	108	C	7	Adaptor protein required for structural integrity of the SAGA complex	11038	BY4742	16_1	y	y	n	1179	Nearby VIK1 is deleted
YPL248C	GAL4	37	108	C	11	DNA-binding transcription factor required for activating GAL genes	11044	BY4742	16_1	y	y	y	1180
YPL202C	AFT2	38	108	F	5	Iron-regulated transcriptional activator	11090	BY4742	16_1	y	y	n
YPL177C	CUP9	39	108	H	5	Homeodomain-containing transcriptional repressor	12075	BY4742	16_2	y	y	y	1183
YPL138C	SPP1	40	109	B	9	Subunit of COMPASS (Set1C)	12114	BY4742	16_2	y	y	y	1184
YPL133C	RDS2	41	109	B	12	Transcription factor involved in regulating gluconeogenesis	12119	BY4742	16_2	y	y	y	1185
YPL129W	TAF14	42	109	C	2	Subunit of TFIID, TFIIF, INO80, SWI/SNF, and NuA3 complexes	12123	BY4742	16_2	y	y	y	1186
YPL127C	HHO1	43	109	C	3	Histone H1, linker histone with roles in meiosis and sporulation	12125	BY4742	16_2	y	y	y	1187
YBR182C	SMP1	44	109	F	4	MADS-box transcription factor involved in osmotic stress response	13322	BY4742	02_4	y	y	y	1188
YBR215W	HPC2	45	109	H	5	Subunit of the HIR complex	13355	BY4742	02_4	y	y	y	1189
YBR239C	ERT1	46	110	B	2	Transcriptional regulator	13379	BY4742	02_4	y	y	y	1190
YBR240C	THI2	47	110	B	3	Transcriptional activator of thiamine biosynthetic genes	13380	BY4742	02_4	y	y	n
YBR245C	ISW1	48	110	B	7	ATPase subunit of imitation-switch (ISWI) class chromatin remodelers	13385	BY4742	02_4	y	y	n
YDR121W	DPB4	49	110	G	11	Subunit of DNA pol epsilon and of ISW2 chromatin accessibility complex	14055	BY4742	04_4	y	y	n
YDR123C	INO2	50	110	H	1	Transcription factor	14057	BY4742	04_4	y	y	n	977
YDR146C	SWI5	51	111	A	10	Transcription factor that recruits Mediator and Swi/Snf complexes	14080	BY4742	04_4	y	y	n
YDR392W	SPT3	52	111	D	10	Subunit of the SAGA and SAGA-like transcriptional regulatory complexes	14228	BY4742	04_7	y	y	y	970
YDR421W	ARO80	53	111	F	5	Zinc finger transcriptional activator of the Zn2Cys6 family	14257	BY4742	04_7	y	y	y	1118
YDR423C	CAD1	54	111	F	7	AP-1-like basic leucine zipper (bZIP) transcriptional activator	14259	BY4742	04_7	y	y	y	1119
YEL009C	GCN4	55	111	G	11	bZIP transcriptional activator of amino acid biosynthetic genes	10249	BY4742	05_2	y	y	y	1191
YER028C	MIG3	56	112	B	3	Transcriptional regulator	10160	BY4742	05_3	y	y	y	1192
YER040W	GLN3	57	112	E	9	Transcriptional activator of genes regulated by nitrogen catabolite r	10173	BY4742	05_3	y	y	y	1193
YER045C	ACA1	58	112	F	1	ATF/CREB family basic leucine zipper (bZIP) transcription factor	10179	BY4742	05_3	y	y	y	1194
YHL027W	RIM101	59	113	G	7	Cys2His2 zinc-finger transcriptional repressor	10936	BY4742	08_1	y	y	n	1195
YHL022C	SPO11	60	113	G	10	Meiosis-specific protein that initiates meiotic recombination	10941	BY4742	08_1	y	y	n	1196
YHL020C	OPI1	61	113	G	11	Transcriptional regulator of a variety of genes	10943	BY4742	08_1	y	y	n	1197
YHL009C	YAP3	62	113	H	7	Basic leucine zipper (bZIP) transcription factor	10954	BY4742	08_1	y	y	n	1198	nearby YHL009W-B deleted
YHR030C	SLT2	63	114	A	8	Serine/threonine MAP kinase	10993	BY4742	08_1	y	y	n
YHR124W	NDT80	64	114	F	3	Meiosis-specific transcription factor	11952	BY4742	08_2	y	y	n
YHR178W	STB5	65	114	H	9	Transcription factor	12872	BY4742	08_3	y	y	y	1122
YHR206W	SKN7	66	115	A	10	Nuclear response regulator and transcription factor	12900	BY4742	08_3	y	y	y	1115		y	y	y	y	1718, 1723
YCL055W	KAR4	67	115	D	12	Transcription factor required for response to pheromones	13462	BY4742	03_1	y	y	y	1116
YLR451W	LEU3	68	115	G	5	Zinc-knuckle transcription factor, repressor and activator	14082	BY4742	12_3	y	y	y	1090
YLR131C	ACE2	69	115	G	9	Transcription factor required for septum destruction after cytokinesis	14088	BY4742	12_3	y	y	y	1091		y	y	y	y	1716, 1721
YLR176C	RFX1	70	116	A	9	Major transcriptional repressor of DNA-damage-regulated genes	14125	BY4742	12_3	y	y	y	1092		y	y	y	y	1729, 1738
YLR182W	SWI6	71	116	B	3	Transcription cofactor	14131	BY4742	12_3	y	y	y	1036		y	y	y	y	1717, 1722
YLR183C	TOS4	72	116	B	5	Putative transcription factor, contains Forkhead Associated domain	14132	BY4742	12_3	y	y	y	1037
YKL015W	PUT3	73	116	E	7	Transcriptional activator	14864	BY4742	11_1	y	y	y	1199
YKL038W	RGT1	74	116	F	7	Glucose-responsive transcription factor	14887	BY4742	11_1	y	y	y	1038
YKL043W	PHD1	75	116	F	11	Transcriptional activator that enhances pseudohyphal growth	14892	BY4742	11_1	y	y	y	1039
YKL062W	MSN4	76	116	G	12	Stress-responsive transcriptional activator	14911	BY4742	11_1	y	y	y	1066
YKL109W	HAP4	77	117	C	2	Transcription factor	14959	BY4742	11_2	y	y	n
YKL110C	KTI12	78	117	C	3	Protein that plays a role in modification of tRNA wobble nucleosides	14960	BY4742	11_2	y	y	n
YGR044C	RME1	79	117	H	8	Zinc finger protein involved in control of meiosis	14674	BY4742	07_4	y	y	n
YGR056W	RSC1	80	118	A	3	Component of the RSC chromatin remodeling complex	14686	BY4742	07_4	y	y	y	1042
YGR104C	SRB5	81	118	C	6	Subunit of the RNA polymerase II mediator complex	14734	BY4742	07_4	y	y	y	1043
YOR113W	AZF1	82	118	E	4	Zinc-finger transcription factor	12369	BY4742	15_2	y	y	y	1044
YOR140W	SFL1	83	118	F	12	Transcriptional repressor and activator	12396	BY4742	15_2	y	y	y	1045
YOR144C	ELG1	84	118	G	2	Subunit of an alternative replication factor C complex	12400	BY4742	15_2	y	y	y	1093	Nearby region also blank
YOR162C	YRR1	85	118	G	8	Zn2-Cys6 zinc-finger transcription factor	12418	BY4742	15_2	y	y	y	1094
YOR172W	YRM1	86	118	H	5	Zinc finger transcription factor involved in multidrug resistance	12428	BY4742	15_2	y	y	y	1095
YOR229W	WTM2	87	119	C	12	Transcriptional modulator	12485	BY4742	15_3	y	y	y	1096
YOR230W	WTM1	88	119	D	1	Transcriptional modulator	12486	BY4742	15_3	y	y	y	1097
YLR418C	CDC73	89	120	F	5	Component of the Paf1p complex	15326	BY4742	12_5	y	y	y	1098
YDR169C	STB3	90	120	G	12	Ribosomal RNA processing element (RRPE)-binding protein	13527	BY4742	04_5	y	y	y	1099
YDR192C	NUP42	91	121	A	1	FG-nucleoporin component of central core of the nuclear pore complex	13551	BY4742	04_5	y	y	y	1100
YDR195W	REF2	92	121	A	3	RNA-binding protein	13554	BY4742	04_5	y	y	y	1046
YDR213W	UPC2	93	121	B	1	Sterol regulatory element binding protein	13572	BY4742	04_5	y	y	y	1101
YDR216W	ADR1	94	121	B	4	Carbon source-responsive zinc-finger transcription factor	13575	BY4742	04_5	y	y	y	1102
YDR223W	CRF1	95	121	B	12	Transcriptional corepressor	13582	BY4742	04_5	y	y	y	1047
YLR263W	RED1	96	122	A	5	Protein component of the synaptonemal complex axial elements	15172	BY4742	12_4	y	y	y	1048
YLR266C	PDR8	97	122	A	8	Transcription factor	15175	BY4742	12_4	y	y	y	1049
YGL209W	MIG2	98	122	F	2	Zinc finger transcriptional repressor	14575	BY4742	07_3	y	y	y	1050
YGL237C	HAP2	99	122	G	11	Subunit of the Hap2p/3p/4p/5p CCAAT-binding complex	14604	BY4742	07_3	y	y	y	1051		y	y	y	y	1724, 1733
YGL254W	FZF1	100	122	H	11	Transcription factor involved in sulfite metabolism	14621	BY4742	07_3	y	y	y	1052
YPL089C	RLM1	101	123	C	5	MADS-box transcription factor	12739	BY4742	16_3	y	y	y	1053
YPL048W	CAM1	102	123	F	4	One of two isoforms of the gamma subunit of eEF1B	12780	BY4742	16_3	y	y	y	1054
YPL038W	MET31	103	123	F	12	Zinc-finger DNA-binding transcription factor	12790	BY4742	16_3	y	y	y	1244
YPL031C	PHO85	104	123	G	5	Cyclin-dependent kinase	12797	BY4742	16_3	y	y	y	1245		y	n	n	n	n/a
YPL021W	ECM23	105	123	H	1	Non-essential protein of unconfirmed function	12807	BY4742	16_3	y	y	y	1246
YPR135W	CTF4	106	124	C	8	Chromatin-associated protein	15550	BY4742	16_5	y	y	y	1247
YPR199C	ARR1	107	124	G	2	Transcriptional activator of the basic leucine zipper (bZIP) family	15614	BY4742	16_5	y	y	y	1248
YCR106W	RDS1	108	124	H	2	Putative zinc cluster transcription factor	15822	BY4742	00_2	y	y	y	1249
YFR034C	PHO4	109	125	A	9	Basic helix-loop-helix (bHLH) transcription factor of the myc-family	15848	BY4742	00_2	y	y	y	1250
YGR249W	MGA1	110	125	E	5	Protein similar to heat shock transcription factor	15902	BY4742	00_2	y	y	y	1251
YBL005W	PDR3	111	125	E	9	Transcriptional activator of the pleiotropic drug resistance network	13029	BY4742	02_1	y	y	y	1252
YBL008W	HIR1	112	125	E	12	Subunit of the HIR complex	13034	BY4742	02_1	y	y	y	1253
YBL016W	FUS3	113	125	F	7	Mitogen-activated serine/threonine protein kinase involved in mating	13042	BY4742	02_1	y	y	y	1254
YBL021C	HAP3	114	125	F	10	Subunit of the Hap2p/3p/4p/5p CCAAT-binding complex	13047	BY4742	02_1	y	y	y	1255
YBL025W	RRN10	115	125	G	1	Protein involved in promoting high level transcription of rDNA	13051	BY4742	02_1
YBL066C	SEF1	116	126	A	11	Putative transcription factor	13092	BY4742	02_1	y	y	y	1256
YBL079W	NUP170	117	126	B	8	Subunit of inner ring of nuclear pore complex (NPC)	13105	BY4742	02_1	y	y	y	1257
YGL013C	PDR1	118	126	D	6	Transcription factor that regulates the pleiotropic drug response	14381	BY4742	07_1	y	y	y	1258
YGL025C	PGD1	119	126	E	1	Subunit of the RNA polymerase II mediator complex	14393	BY4742	07_1	y	y	y	1259
YGL035C	MIG1	120	126	E	9	Transcription factor involved in glucose repression	14403	BY4742	07_1	y	y	y	1260
YGL071W	AFT1	121	126	G	9	Transcription factor involved in iron utilization and homeostasis	14438	BY4742	07_1	y	y	y	1262
YGL090W	LIF1	122	127	A	1	Component of the DNA ligase IV complex	14457	BY4742	07_1	y	y	y	1263
YNL229C	URE2	123	127	A	5	Nitrogen catabolite repression transcriptional regulator	11983	BY4742	14_2	y	y	y	1264		y	y	y	y	1730, 1739
YNL167C	SKO1	124	127	D	9	Basic leucine zipper transcription factor of the ATF/CREB family	12045	BY4742	14_2	y	y	y	1265
YKR064W	OAF3	125	128	B	3	Putative transcriptional repressor with Zn(2)-Cys(6) finger	15135	BY4742	11_3	y	y	y	1266
YDR253C	MET32	126	128	C	2	Zinc-finger DNA-binding transcription factor	13612	BY4742	04_6	y	y	y	1267
YDR259C	YAP6	127	128	C	9	Basic leucine zipper (bZIP) transcription factor	13618	BY4742	04_6	y	y	y	1268
YDR310C	SUM1	128	128	F	12	Transcriptional repressor that regulates middle-sporulation genes	13669	BY4742	04_6	y	y	y	1269		y	y	y	y	1731, 1740
YDR321W	ASP1	129	128	G	10	Cytosolic L-asparaginase, involved in asparagine catabolism	13680	BY4742	04_6	y	y	y	1270
YIL036W	CST6	130	129	B	6	Basic leucine zipper (bZIP) transcription factor from ATF/CREB family	11429	BY4742	09_1	y	y	n
YIL076W	SEC28	131	129	C	11	Epsilon-COP subunit of the coatomer	11469	BY4742	09_1	y	y	y	1272
YFL021W	GAT1	132	129	E	4	Transcriptional activator of nitrogen catabolite repression genes	15640	BY4742	06_1	y	y	y	1273
YFL031W	HAC1	133	129	E	11	Basic leucine zipper (bZIP) transcription factor (ATF/CREB1 homolog)	15650	BY4742	06_1	y	y	y	1274
YFL049W	SWP82	134	129	F	11	Member of the SWI/SNF chromatin remodeling complex	15670	BY4742	06_1	y	y	y	1275
YFL052W	ZNF1	135	129	G	3	Zinc cluster transcription factor that regulates respiratory growth	15673	BY4742	06_1	y	y	y	1276
YGR270W	YTA7	136	130	A	12	Protein that localizes to chromatin	15922	BY4742	00_3	y	y	y	1277
YGR288W	MAL13	137	130	B	10	MAL-activator protein	15940	BY4742	00_3	y	y	y	1278
YIR017C	MET28	138	130	C	4	bZIP transcriptional activator in the Cbf1p-Met4p-Met28p complex	15951	BY4742	00_3	y	y	y	1279
YIR018W	YAP5	139	130	C	5	Basic leucine zipper (bZIP) iron-sensing transcription factor	15952	BY4742	00_3	y	y	y	1280
YMR070W	MOT3	140	130	G	3	Transcriptional repressor, activator	16203	BY4742	00_6	y	y	y	1281
YMR091C	NPL6	141	130	H	12	Component of the RSC chromatin remodeling complex	16226	BY4742	00_6	y	y	n	1200	Nearby YMR090W deleted
YOL089C	HAL9	142	131	A	12	Putative transcription factor containing a zinc finger	16239	BY4742	00_6	y	y	y	1201
YOL108C	INO4	143	131	C	4	Transcription factor involved in phospholipid synthesis	16258	BY4742	00_6	y	y	y	1202
YML099C	ARG81	144	132	D	9	Zinc finger transcription factor involved in arginine-responsive genes	16497	BY4742	00_9	y	y	y	1203		y	y	y	y	1707, 1712
YPR052C	NHP6A	145	133	C	12	High-mobility group (HMG) protein	15471	BY4742	16_4	y	y	y	1204
YPR054W	SMK1	146	133	D	2	Middle sporulation-specific mitogen-activated protein kinase (MAPK)	15473	BY4742	16_4	y	y	y	1058
YPR065W	ROX1	147	133	D	10	Heme-dependent repressor of hypoxic genes	15484	BY4742	16_4	y	y	y	1059		y	y	y	y	1714, 1719
YPR070W	MED1	148	133	E	2	Subunit of the RNA polymerase II mediator complex	15489	BY4742	16_4	y	y	y	1060
YJL110C	GZF3	149	133	G	10	GATA zinc finger protein	11313	BY4742	10_2	y	y	y	1061
YJL089W	SIP4	150	133	H	9	C6 zinc cluster transcriptional activator	11334	BY4742	10_2	y	y	y	1062
YJL056C	ZAP1	151	134	B	4	Zinc-regulated transcription factor	11367	BY4742	10_2	y	y	y	1063
YJR127C	RSF2	152	134	D	12	Zinc-finger protein	12605	BY4742	10_4	y	y	y	1064
YJR147W	HMS2	153	134	E	7	Protein with similarity to heat shock transcription factors	12625	BY4742	10_4	y	y	n
YER063W	THO1	154	134	F	2	Conserved nuclear RNA-binding protein	16585	BY4742	00_10	y	y	y	1069
YHR006W	STP2	155	134	G	1	Transcription factor	16603	BY4742	00_10	y	y	y	1070
YHR041C	SRB2	156	134	G	6	Subunit of the RNA polymerase II mediator complex	16611	BY4742	00_10	y	y	y	1071
YKR099W	BAS1	157	135	A	11	Myb-related transcription factor	16015	BY4742	00_4	y	y	y	1072		y	y	y	y	1706, 1711
YKR101W	SIR1	158	135	B	1	Protein involved in silencing at mating-type loci HML and HMR	16017	BY4742	00_4	y	y	y	1073
YJR104C	SOD1	159	136	B	7	Cytosolic copper-zinc superoxide dismutase	16913	BY4742	00_12	y	y	y	1074
YJR119C	JHD2	160	136	C	3	JmjC domain family histone demethylase	16922	BY4742	00_12	y	y	y	1075
YJR140C	HIR3	161	136	D	3	Subunit of the HIR complex	16934	BY4742	00_12	y	y	y	1076
YKL005C	BYE1	162	136	D	10	Negative regulator of transcription elongation	16942	BY4742	00_12	y	y	y	1077
YMR136W	GAT2	163	136	E	6	Protein containing GATA family zinc finger motifs	16956	BY4742	00_12	y	y	y	1065
YMR172W	HOT1	164	136	E	7	Transcription factor for glycerol biosynthetic genes	16957	BY4742	00_12	y	y	y	1078
YDR034C	LYS14	165	137	C	4	Transcriptional activator involved in regulating lysine biosynthesis	13973	BY4742	04_3	y	y	y	1079	Nearby YDR034C-D also seems deleted
YDR043C	NRG1	166	137	C	8	Transcriptional repressor	13979	BY4742	04_3	y	y	y	1080	Nearby region blank
YBR279W	PAF1	167	137	D	7	Component of the Paf1p complex involved in transcription elongation	15727	BY4742	00_1	y	y	y	1081
YBR297W	MAL33	168	137	E	8	MAL-activator protein	15745	BY4742	00_1	y	y	y	1082	MAL32 also blank
YCR020W-B	HTL1	169	137	E	12	Component of the RSC chromatin remodeling complex	15751	BY4742	00_1	y	y	y	1083	Nearby region blank
YCR065W	HCM1	170	137	G	8	Forkhead transcription factor	15786	BY4742	00_1	y	y	y	1084
YCR077C	PAT1	171	137	H	2	Deadenylation-dependent mRNA-decapping factor	15797	BY4742	00_1	y	y	y	1085
YCR081W	SRB8	172	137	H	5	Subunit of the RNA polymerase II mediator complex	15799	BY4742	00_1	y	y	y	1086
YJR060W	CBF1	173	138	E	7	Basic helix-loop-helix (bHLH) protein	16858	BY4742	00_13	y	y	y	1087		y	y	y	y	1705, 1710
YDL106C	PHO2	174	138	F	4	Homeobox transcription factor	13803	BY4742	4_2	y	y	y	1103
YDL160C	DHH1	175	139	A	9	Cytoplasmic DEAD-box helicase, stimulates mRNA decapping	13858	BY4742	4_2	y	y	y	1104
YDL170W	UGA3	176	139	B	3	Transcriptional activator for GABA-dependent induction of GABA genes	13868	BY4742	4_2	y	y	y	1105
YGL096W	TOS8	177	139	E	2	Homeodomain-containing protein and putative transcription factor	14463	BY4742	7_1	y	y	y	1205
YBL103C	RTG3	178	139	H	6	bHLH/Zip transcription factor for retrograde (RTG) and TOR pathways	13131	BY4742	2_2	y	y	y	1106	Nearby region also blank
YBR010W	HHT1	179	140	A	5	Histone H3	13145	BY4742	2_2	y	y	y	1107	Nearby region also blank
YBR033W	EDS1	180	140	C	1	Putative zinc cluster protein, predicted to be a transcription factor	13170	BY4742	2_2	y	y	y	1108	Nearby RPL4A blank
YBR066C	NRG2	181	140	E	5	Transcriptional repressor	13203	BY4742	2_2	y	y	y	1109
YNL023C	FAP1	182	140	G	9	Protein that binds to Fpr1p	15349	BY4742	14_4	y	y	y	1110
YNL027W	CRZ1	183	140	G	12	Transcription factor, activates transcription of stress response genes	15353	BY4742	14_4	y	y	y	1111
YNR010W	CSE2	184	141	B	3	Subunit of the RNA polymerase II mediator complex	15385	BY4742	14_4	y	y	y	1055		y	y	y	y	1726, 1735
YIL101C	XBP1	185	141	G	8	Transcriptional repressor	12260	BY4742	9_2	y	y	y	1112
YIL130W	ASG1	186	142	A	3	Zinc cluster protein proposed to be a transcriptional regulator	12289	BY4742	9_2	y	y	y	1113
YIR013C	GAT4	187	142	D	4	Protein containing GATA family zinc finger motifs	12349	BY4742	9_2	y	y	y	1114
YFR013W	IOC3	188	142	F	1	Subunit of the Isw1a complex	17207	BY4742	00_16	y	y	y	1282
YNL068C	FKH2	189	142	F	8	Forkhead family transcription factor	17216	BY4742	00_16	y	y	y	1283
YGR040W	KSS1	190	143	B	7	Mitogen-activated protein kinase (MAPK)	16981	BY4742	00_14	y	y	y	1284
YGR063C	SPT4	191	143	B	10	Spt4p/5p (DSIF) transcription elongation factor complex subunit	16986	BY4742	00_14	y	y	y	1285
YKR034W	DAL80	192	143	F	11	Negative regulator of genes in multiple nitrogen degradation pathways	17047	BY4742	00_14	y	y	y	1286
YBR083W	TEC1	193	143	G	8	Transcription factor targeting filamentation genes and Ty1 expression	17155	BY4742	00_16	y	y	y	1287
YBR112C	CYC8	194	143	G	12	General transcriptional co-repressor	17161	BY4742	00_16	y	y	y	1329	Nearby LYS2 deleted also
YBR150C	TBS1	195	143	H	4	Protein of unknown function	17165	BY4742	00_16	y	y	y	1288
YLR394W	CST9	196	144	D	4	SUMO E3 ligase	16716	BY4742	00_11	y	y	y	1289
YML041C	VPS71	197	144	D	11	Nucleosome-binding component of the SWR1 complex	16727	BY4742	00_11	y	y	y	1290
YML076C	WAR1	198	144	E	3	Homodimeric Zn2Cys6 zinc finger transcription factor	16734	BY4742	00_11	y	y	y	1330
YOR298C-A	MBF1	199	144	F	1	Transcriptional coactivator	16753	BY4742	00_11
YIR023W	DAL81	200	144	G	1	Positive regulator of genes in multiple nitrogen degradation pathways	17303	BY4742	00_17	y	y	y	1323
YOR298C-A	MBF1	201	145	A	6	Transcriptional coactivator	17335	BY4742	00_17	y	y	y	1324
YMR037C	MSN2	202	145	D	11	Stress-responsive transcriptional activator	17117	BY4742	00_15	y	y	y	1325
YPR007C	REC8	203	145	E	7	Meiosis-specific component of the sister chromatid cohesion complex	17136	BY4742	00_15	y	y	y	1326
YPR008W	HAA1	204	145	E	8	Transcriptional activator involved in adaptation to weak acid stress	17137	BY4742	00_15	y	y	y	1327
YDL020C	RPN4	205	146	D	8	Transcription factor that stimulates expression of proteasome genes	13716	BY4742	4_1	y	y	y	1328
YDL056W	MBP1	206	146	G	2	Transcription factor	13753	BY4742	4_1	y	y	y	1331		y	y	y	y	1728, 1737
YDR443C	SSN2	207	147	B	4	Subunit of the RNA polymerase II mediator complex	14279	BY4742	4_8	y	y	y	1332
YDR448W	ADA2	208	147	B	7	Transcription coactivator	14282	BY4742	4_8	y	y	y	1333		y	y	y	y	1732, 1741
YDR463W	STP1	209	147	C	6	Transcription factor	14297	BY4742	4_8	y	y	y	1334
YDR501W	PLM2	210	147	E	8	Putative transcription factor, contains Forkhead Associated domain	14335	BY4742	4_8	y	y	y	1359
YDR520C	URC2	211	147	F	12	Putative Zn(II)2Cys6 motif containing transcription factor	14354	BY4742	4_8	y	y	y	1336
YGL127C	SOH1	212	148	A	2	Subunit of the RNA polymerase II mediator complex	14494	BY4742	7_2	y	y	y	1337
YGL131C	SNT2	213	148	A	4	Subunit of Snt2C complex, RING finger ubiquitin ligase (E3)	14498	BY4742	7_2	y	y	y	1360
YGL151W	NUT1	214	148	B	7	Component of the RNA polymerase II mediator complex	14518	BY4742	7_2	y	y	y	1338
YGL162W	SUT1	215	148	C	5	Zn(II)2Cys6 family transcription factor	14529	BY4742	7_2	y	y	y	1339
YGL166W	CUP2	216	148	C	9	Copper-binding transcription factor	14533	BY4742	7_2	y	y	y	1340
YGL173C	XRN1	217	148	D	1	Evolutionarily-conserved 5'-3' exonuclease	14540	BY4742	7_2	y	y	y	1341
YER109C	FLO8	218	148	E	2	Transcription factor	16107	BY4742	00_5	y	y	y	1361	Only 5' deleted
YER111C	SWI4	219	148	E	4	DNA binding component of the SBF complex (Swi4p-Swi6p)	16109	BY4742	00_5	y	y	y	1342		y	y	y	y	1715, 1720
YER164W	CHD1	220	148	H	9	Chromatin remodeler that regulates various aspects of transcription	16160	BY4742	00_5	y	y	y	1343
YER173W	RAD24	221	149	A	2	Checkpoint protein	16169	BY4742	00_5	y	y	y	1344
YER184C	TOG1	222	149	B	1	Transcriptional activator of oleate genes	16180	BY4742	00_5	y	y	y	1347
YIL131C	FKH1	223	149	C	8	Forkhead family transcription factor	12290	BY4742	9_2	y	y	y	1345
YIL056W	VHR1	224	149	C	12	Transcriptional activator	11449	BY4742	9_1	y	y	y	1346
YLR357W	RSC2	225	149	G	5	Component of the RSC chromatin remodeling complex	15266	BY4742	12_5	y	y	y	1348		y	y	y	y	1725, 1734
YJL103C	GSM1	226	150	C	4	Putative zinc cluster protein of unknown function	17367	BY4742	00_18	y	y	y	1349
YOL148C	SPT20	227	150	D	10	Subunit of the SAGA transcriptional regulatory complex	17390	BY4742	00_18
YMR021C	MAC1	228	170	A	7	Copper-sensing transcription factor	10596	BY4742	13_2	y	y	y	1350
YJL124C	LSM1	229	171	B	7	Lsm (Like Sm) protein	11301	BY4742	10_2	y	y	y	1351
YIL154C	IMP2'	230	171	C	5	Transcriptional activator involved in maintenance of ion homeostasis	12313	BY4742	9_2	y	y	n
YJL184W	GON7	231	171	C	6	Component of the EKC/KEOPS protein complex	17017	BY4742	00_14
YBL093C	ROX3	232	171	D	6	Subunit of the RNA polymerase II mediator complex	13119	BY4742	02_1
YLR399C	BDF1	233	171	E	6	Protein involved in transcription initiation	15308	BY4742	12_5	y	y	y	1353
YOR290C	SNF2	234	171	F	2	Catalytic subunit of the SWI/SNF chromatin remodeling complex	11586	BY4742	15_4	y	y	n
